1 **Citrullination regulates wound responses and tissue regeneration in zebrafish**

2 Short title: Padi-deficient zebrafish regeneration model

3

4 Netta Golenberg<sup>1,2</sup>, Jayne M. Squirrell<sup>3</sup>, David A. Bennin<sup>1,4</sup>, Julie Rindy<sup>1,4</sup>, Paige E.

5 Pistono<sup>1,4</sup>, Kevin W. Eliceiri<sup>3</sup>, Miriam A. Shelef<sup>5,6</sup>, Junsu Kang<sup>7</sup>, and Anna

6 Huttenlocher<sup>1,4\*</sup>

7

8 <sup>1</sup>Department of Medical Microbiology and Immunology, University of Wisconsin-  
9 Madison, Madison, WI, USA

10

11 <sup>2</sup>Cell and Molecular Biology Doctoral Training Program, University of Wisconsin-  
12 Madison, Madison, WI, USA

13

14 <sup>3</sup>Laboratory for Optical and Computational Instrumentation, University of Wisconsin-  
15 Madison, Madison, WI, USA

16

17 <sup>4</sup>Department of Pediatrics, University of Wisconsin-Madison, Madison, WI, USA

18

19 <sup>5</sup>Department of Medicine, University of Wisconsin-Madison, Madison, WI, USA

20

21 <sup>6</sup>William S. Middleton Memorial Veterans Hospital, Madison, WI, USA

22

23 <sup>7</sup>Department of Cell and Regenerative Biology, University of Wisconsin-Madison,  
24 Madison, WI, USA

25

26

27

28 \*huttenlocher@wisc.edu

29

30 **Summary:**

31

32 Golenberg et al. developed a citrullination-deficient zebrafish and demonstrated a role  
33 for Padi2 in fin wound responses and regeneration. This work identified a distinct  
34 population of cells within the regenerative notochord bead that exhibited wound-induced  
35 histone citrullination.

36 **Abstract**

37 Calcium signaling is an important early step in wound healing, yet how these  
38 early signals promote regeneration remains unclear. Peptidylarginine deiminases  
39 (PADs), a family of calcium-dependent enzymes, catalyze citrullination, a post-  
40 translational modification that alters protein function and has been implicated in  
41 autoimmune diseases. We generated a mutation in the single zebrafish ancestral *pad*  
42 gene, *padi2*, resulting in a loss of detectable calcium-dependent citrullination. The *padi2*  
43 mutants exhibit impaired resolution of inflammation and regeneration after caudal fin  
44 transection. Further, we identified a new subpopulation of cells displaying citrullinated  
45 histones within the notochord bead following tissue injury. Citrullination of histones in  
46 this region was absent and wound-induced proliferation was perturbed in Padi2-  
47 deficient larvae. Taken together, our results show that Padi2 is required for the  
48 citrullination of histones within a group of cells in the notochord bead, and for promoting  
49 wound-induced proliferation required for efficient regeneration. These findings identify  
50 Padi2 as a potential intermediary between early calcium signaling and subsequent  
51 tissue regeneration.

52

53

54

55

56

57

58

## 59 **Introduction**

60           Humans have limited regenerative capacity, resulting in injury-induced scarring  
61 and loss of tissue function in response to damage that can present significant clinical  
62 challenges. Because mammalian wound repair occurs through similar stages as  
63 regeneration in simple animal models (Yokoyama, 2008), regenerative animal models  
64 may provide insight into the molecular signals that optimize mammalian wound healing.  
65 After wounding, early signals activate a series of regenerative steps. The initial wound-  
66 healing phase is defined by the migration and formation of the wound epithelium and  
67 the recruitment of immune cells (Roehl, 2018). This is followed by the regenerative  
68 program, including the formation of a blastema, a mass of stem-cell like cells that  
69 mediate cell proliferation and restoration of damaged tissue (Whitehead et al., 2005).  
70 Improper activation or regulation of these tightly controlled steps results in improper  
71 regeneration. Although increased cytosolic calcium early in wound healing has been  
72 linked to later regenerative proliferation (Globus et al., 1987; Lagoudakis et al., 2010;  
73 Yoo et al., 2012a), there is limited understanding of how these early signals impact later  
74 regenerative events.

75           An attractive candidate to link calcium increase with subsequent regeneration is  
76 the family of calcium-dependent enzymes, peptidylarginine deiminases (PADIs or  
77 PADs), which catalyze the deimination of a peptidyl-arginine to the neutrally-charged,  
78 non-coded amino acid, citrulline (Vossenaar et al., 2003). These enzymes were recently  
79 implicated in stem cell pluripotency because citrullination of histones and chromatin  
80 modifiers can maintain pluripotency by promoting an open chromatin state, thereby  
81 regulating gene expression (Christophorou et al., 2014; Wiese et al., 2019; Xiao et al.,

82 2017). Increased expression and activity of PAD enzymes is associated with  
83 autoimmune disorders, cancers, and neurodegenerative disorders (Chang et al., 2009;  
84 Gyorgy et al., 2006). While PADs have been studied in mammalian models, the  
85 presence of multiple PAD isoforms and functional redundancies make it challenging to  
86 dissect the role of citrullination in normal development and tissue repair.

87 Zebrafish, *Danio rerio*, have one highly-conserved copy of a *pad* gene, *padi2*,  
88 that shares canonical mammalian PAD features, with conserved enzymatic activity and  
89 calcium dependence. We generated a *padi2* mutant zebrafish line lacking detectable  
90 calcium-dependent citrullination activity while displaying normal developmental but  
91 impaired regenerative growth. This work provides insight into how calcium-dependent  
92 citrullination may integrate early signals induced by injury to mediate subsequent tissue  
93 repair.

## 94 **Results and discussion**

### 95 **Characterization of zebrafish peptidylarginine deiminase**

96 To examine the role of citrullination in zebrafish, we first characterized the  
97 annotated zebrafish *pad* gene, *padi2*. A 7-exon transcript (203) and two 16-exon  
98 transcripts with alternative start sites (201 and 202) are annotated (Fig S1 A). The 7-  
99 exon transcript is predicted to lack the catalytic C-terminus, therefore, we focused on  
100 cloning the transcripts with the two predicted alternative start sites and the shared exon  
101 16 and identified two splice variants of *padi2*. These transcripts have different first  
102 exons, but both splice variants share a complete exon 10, contrary to the genome  
103 assembly predictions (Fig S1 A, arrows). Due to these discrepancies, these transcripts  
104 are referred to here as 201a and 202 (Fig S1 A). These transcripts are highly conserved

105 with human PADs and share 55% amino acid identity and 69% similarity to human  
106 PAD2 with conserved catalytic, substrate-binding and calcium-coordinating amino acids  
107 (Fig S1 B) (Smith and Waterman, 1981). Using our newly generated polyclonal  
108 antibody, immunoblotting showed a doublet at 75-80 kDa, providing further evidence for  
109 two full-length zebrafish *padi2* splice variants (Fig S1 C, arrow). Notably, this antibody  
110 did not detect a protein of equivalent size to the predicted transcript 203 (~35 kDa) (Fig  
111 S1 C). The absence of this doublet with pre-immune serum and the detection of an  
112 appropriately sized protein in *padi2*-201a mRNA-injected larvae demonstrates the  
113 specificity of the antibody (Fig S1 D and E). This antibody also detected a large protein  
114 species at roughly 200 kDa that is of unclear significance (Fig S1 C, asterisk).

115 To assess citrullination activity, we used a colorimetric *in vitro* citrullination  
116 activity assay and detected citrullination activity with both bacterially expressed Padi2  
117 variants (Fig 1 A) (Nakayama-Hamada et al., 2005). Mammalian PADs bind 5-6 calcium  
118 ions for proper structure and activity, with essential roles for Ca1 and Ca2 (Arita et al.,  
119 2004). Similarly, zebrafish Padi2 activity was also calcium dependent (Fig 1 A).  
120 Furthermore, alanine point mutations of amino acids predicted to be necessary for Ca1  
121 and Ca2 binding sites (Arita et al., 2004) impaired *in vitro* citrullination activity (Fig 1 B  
122 and Fig S1 F). Mutation of the catalytic cysteine also abolished activity (Fig 1 B and Fig  
123 S1 F). These data indicate that zebrafish Padi2 is a canonical PAD with similar function  
124 as mammalian PAD enzymes.

### 125 **Generation of a *padi2* zebrafish mutant**

126 Padi2 is the ancestral protein of the mammalian PADs, with the broadest tissue  
127 distribution and substrate specificity in mammals (Rebl et al., 2010; Vossenaar et al.,

128 2003). To characterize the role of citrullination in regeneration, we generated a  
129 zebrafish *padi* mutant using CRISPR/Cas9 gene editing, targeting exon 7 of *padi2*, an  
130 optimal target region preceding the catalytic amino acids and essential calcium binding  
131 sites. The resulting CRISPR-generated product had a 20 base pair deletion (Fig 1 C  
132 and D) and caused a predicted frameshift mutation resulting in an early stop codon.  
133 Padi2 homozygous mutants (*padi2*<sup>-/-</sup>) had reduced levels of *padi2* mRNA (Fig 1 E) and  
134 loss of Padi2 protein (Fig 1 F and Fig S1 C) at 2 days post fertilization (dpf).  
135 Additionally, we used the citrullination assay on lysates from whole 2 dpf larvae to  
136 detect calcium-dependent citrullination activity. Importantly, *padi2*<sup>-/-</sup> zebrafish lysates  
137 lacked citrullination activity, even in the presence of excess calcium (Fig 1 G), indicating  
138 that Padi2 is likely the only protein with detectable citrullination activity in long pec  
139 zebrafish larvae. Interestingly, although previous studies have indicated that  
140 mammalian PAD1 and PAD6 are necessary for normal development and fertility  
141 (Esposito et al., 2007; Kan et al., 2012; Zhang et al., 2016), we found that the Padi2-  
142 deficient zebrafish did not display any gross morphological defects, had normal viability  
143 and crossings of this mutant line following expected Mendelian ratios (Fig S2 A and B).  
144 A homozygous incross produces viable and developmentally normal maternal-zygotic  
145 embryos indicating a maternal *padi2* contribution is not necessary during early  
146 embryonic development. To further address the role of citrullination in early  
147 development, we detected citrullination activity in cleavage- and gastrula-stage embryos  
148 and showed citrullination activity and Padi2 protein expression during both pre- and  
149 post- maternal to zygotic transition in wild-type embryos activity in 1-2 hpf larvae. This  
150 detected activity and protein was absent in the Padi2-deficient larvae (Fig 1 H and I).

151 These observations provide the first evidence that citrullination is not necessary for  
152 broadly normal development in zebrafish.

153 The mammalian PAD2 is the predominant isozyme in skeletal muscle and  
154 nervous system (Kubilus and Baden, 1983; Watanabe et al., 1988; Watanabe and  
155 Senshu, 1989). To further characterize the mutant line, we examined the effects of the  
156 mutation on muscle development in zebrafish. We visualized slow and fast-twitch  
157 muscles in the trunk of 5 dpf larvae by staining for myosin heavy chain and F-actin. Both  
158 skeletal muscle fibers in the *padi2*<sup>-/-</sup> larvae appeared morphologically comparable to  
159 wild-type (Fig S2 C and D). To examine neuromuscular synapses in the trunk of 5 dpf  
160 larvae, we immunostained for presynaptic vesicles ( $\alpha$ -SV2) and acetylcholine receptors  
161 (AChR,  $\alpha$ -BTX) (Fig S2 E and F). Quantification of these puncta showed that *padi2*<sup>-/-</sup>  
162 larvae form more neuromuscular junctions than wild-type larvae (Fig S2 F). Previous  
163 studies show that Padi2 is expressed in central synapses (Bayes et al., 2017) and that  
164 PAD2 mice displayed behavioral defects (Falcao et al., 2019). These data suggest that  
165 citrullination may regulate the development of synapses, providing an interesting  
166 avenue for future investigation.

### 167 **Padi2 is required for efficient epimorphic regeneration**

168 To determine the role of citrullination in wound healing and regeneration, we  
169 performed a tail transection of 2.5 dpf larvae through the notochord without wounding  
170 the caudal vein, as described by Rojas-Munoz *et al.* 2009. *padi2* expression during  
171 regeneration was determined at 24 hours post wounding (hpw) by qPCR analysis on  
172 extracted wounded fin tissue compared to age-matched, unwounded tissue (3 dpf).  
173 *padi2* was expressed in the affected tissue during regeneration and remained low in

174 *padi2*<sup>-/-</sup> wounded fins (Fig S3 A). Regeneration of the fin was assessed 3 days post  
175 wounding (dpw) by measuring the fin length from the blood circulation loop to the edge  
176 of the fin along the notochord axis (Fig 2 A). Regrowth of the fin was impaired in the  
177 *Padi2*-deficient larvae compared to wild-type cousins (Fig 2 B). Similar effects were  
178 observed with transient morpholino depletion of *padi2* following a fin fold excision (Fig  
179 S3 B). *padi2*<sup>-/-</sup> larvae had a slight, but statistically significant, increase in their  
180 developmental fin length at 5 dpf compared to wild-type cousins (Fig 2 C), indicating  
181 *Padi2* has different roles during fin development and regeneration. These findings  
182 suggest that *Padi2* is necessary for efficient tail fin regeneration, identifying a new role  
183 for citrullination in wound repair. Interestingly, PAD activity and excessive citrullination  
184 has previously been linked with poor wound healing in mice and chick embryos  
185 (Coudane et al., 2011; Lange et al., 2011; Wong et al., 2015). It is possible that the  
186 absence of a PAD4 orthologue in zebrafish may contribute to these differences and  
187 their high regenerative capacity. Taken together, these findings support the idea that  
188 tight regulation of citrullination activity is necessary for normal regeneration.  
189 Furthermore, these results highlight the different mechanisms underlying developmental  
190 and regenerative growth.

### 191 ***Padi2* modulates leukocyte recruitment to a wound**

192 A hallmark of wound repair is leukocyte infiltration and subsequent resolution of  
193 inflammation that can modulate wound healing (Wilgus et al., 2013). Citrullination has  
194 been shown to affect the immune response in human disease (Li et al., 2010), with  
195 direct evidence for deimination of leukocyte chemotactic cues (Loos et al., 2009; Proost  
196 et al., 2008; Yoshida et al., 2014). To visualize leukocyte responses to a wound, we



197 compared *padi2*<sup>-/-</sup> and wild-type cousin larvae with either labeled neutrophils  
198 (*Tg(lyzc:H2B-mCherry)*) or macrophages (*Tg(mpeg1:H2B-GFP)*) and quantified  
199 leukocyte numbers within the region posterior to the blood circulation loop (Fig 2 D-G).  
200 *Padi2*-deficient larvae had a consistent increase in neutrophils at the wound at 6, 24,  
201 and 48-hour post wounding (hpw) (Fig 2 E and F). This difference is not due to altered  
202 total neutrophil numbers as total numbers in *padi2* mutants were not significantly  
203 different than their wild-type cousins (Fig S3 C), although there was a small increase of  
204 neutrophils in the unwounded fin (Fig S3 D). We also found a small increase in  
205 macrophages at the wound site in *padi2*<sup>-/-</sup> larvae, although this difference did not persist  
206 and there was no change in total macrophage numbers (Fig 2 E, G and Fig S3 E, F).  
207 Interestingly, macrophages displayed a localized aggregation around the notochord  
208 bead at 6 hpw and 24hpw (Fig 2 E), suggesting a potential role for macrophages in the  
209 notochord bead during wound healing. Taken together, these findings are consistent  
210 with a recent report showing that lymph nodes from PAD2 knockout mice show an  
211 increase in the expression of genes involved with leukocyte migration (Liu et al., 2018).  
212 It is unclear if the persistent leukocyte infiltration is due to a failure of wound resolution  
213 or due to a direct effect of citrullination on leukocyte signaling pathways. Citrullination of  
214 chemokines have been reported to dampen inflammatory signaling (Loos et al., 2008;  
215 Proost et al., 2008; Struyf et al., 2009), and the neutrophil chemokine, Cxcl8, and its  
216 receptors, Cxcr1 and Cxcr2, regulate neutrophil forward and reverse migration in  
217 response to a wound (Powell et al., 2017). Alternatively, citrullination of extracellular  
218 matrix (ECM) components, such as collagen or fibronectin, affect cell migration (Shelef

219 et al., 2012; Sipila et al., 2014; Yuzhalin et al., 2018), and could potentially regulate  
220 inflammation by altering the wound ECM.

### 221 **Wounding induces localized histone citrullination in the notochord bead**

222 We next considered whether wounding induces localized citrullination of histones  
223 in larval zebrafish due to the reported role of citrullinated histones in maintaining  
224 pluripotency (Christophorou et al., 2014; Wiese et al., 2019; Xiao et al., 2017). First, we  
225 assayed for total histone H4 citrullination, using immunoblotting, in whole larvae lysates  
226 treated *ex vivo* with calcium. Whole larvae lysate from wild-type larvae showed calcium-  
227 dependent citrullination of histone H4 (H4cit3) that was not present in *padi2*<sup>-/-</sup> lysate (Fig  
228 3 A), indicating that Padi2 mediates histone citrullination in zebrafish larvae. While  
229 PAD4, but not PAD2 is required for histone citrullination in activated neutrophils in  
230 mammals (Holmes et al., 2019), our data suggest that zebrafish Padi2 adopts some  
231 functions of the later evolved PADs. Caudal fin transection results in increased  
232 intracellular calcium at a wound (Yoo et al., 2012a) which may promote citrullination.  
233 Visualization of histone H4 citrullination upon caudal fin amputation in wild-type  
234 zebrafish revealed signal exclusively within a localized group of cells in the notochord  
235 bead (Fig 3 B and C), a region previously described as the regeneration blastema  
236 (Rojas-Munoz et al., 2009). Immunofluorescence microscopy revealed H4cit3 signal as  
237 early as 1 hpw and this citrullination persisted up to 24 hpw (Fig 3 C). Histone H4  
238 citrullination was diminished by 48 hpw, and was undetectable in the regenerated fin at  
239 72 hpw (Fig 3 B and C). This histone H4 deimination is wound dependent as no signal  
240 was observed in unwounded larvae (Fig S3 G).

241 To further characterize this structure, we used multiphoton microscopy to  
242 understand the 3D localization of citrullinated histones within the context of the  
243 wounded fin. Using second harmonic generation (SHG) to visualize the collagen fiber  
244 network, in conjunction with H4cit3 immunostaining, we observed citrullinated histones  
245 in a region devoid of collagen fibers at 6 hpw (Fig 3 D). The notochord bead containing  
246 this signal formed posterior to the original wound axis demarcated by the end of the  
247 collagen network. Labeling F-actin to visualize cell borders demonstrated that the  
248 notochord bead is composed of multiple cells (Fig 3 E). The H4cit3 signal colocalized  
249 with DAPI but only a subset of nuclei in this region were positive for histone  
250 citrullination. Nuclei with histone citrullination can also be observed in cells outside the  
251 notochord bead; it is possible that these cells move into this region from the notochord  
252 (Fig 3 E, F). While mammalian PAD2 lacks a canonical nuclear localization signal,  
253 evidence for nuclear localization and activity have been reported (Cherrington et al.,  
254 2010; Cherrington et al., 2012; Zheng et al., 2019). Future experiments will be needed  
255 to verify the mechanism by which zebrafish Padi2 translocates into the nucleus. Finally,  
256 visualization of the epithelium using *Tg(krt4:EGFP)* revealed that histone citrullination  
257 did not occur within epithelial cells (Fig 3 F). By 6 hpw, the wound epithelium has  
258 already formed and encompasses the citrullinated cells and notochord bead (Fig 3 F).  
259 Taken together, we have identified a new wound-induced structure within the notochord  
260 bead comprised of a subpopulation of cells with citrullinated histones. Given the  
261 previous work implicating citrullinated histones in pluripotency, this raises the intriguing  
262 possibility that these cells represent a key signaling hub in regenerative growth. Future

263 work will be needed to identify which cells or signals are necessary to promote  
264 citrullination only within this subpopulation of notochord bead cells.

265       Toward this goal, we found that wound-induced histone citrullination was absent  
266 in *padi2*<sup>-/-</sup> larvae at 24 hpw (Fig 3 G). In the *padi2*<sup>-/-</sup> larvae, wounding did not induce  
267 histone H4 citrullination in the notochord bead above unwounded levels, in contrast to  
268 their wild-type cousins (Fig 3 G-I). Morphologically, both wild-type and *Padi2*-deficient  
269 larvae formed similar sized notochord beads early after wounding (Fig 3 J). Previous  
270 reports show that this region of cells act as a required wound-signaling center and  
271 blastema structure that orchestrates regeneration (Rojas-Munoz et al., 2009; Romero et  
272 al., 2018). Importantly, this population of cells with citrullinated histones were associated  
273 with the blastema reporter, *Tg(lepb:EGFP)* (Kang et al., 2016) (Fig S3 H and I). Our  
274 data indicate that citrullination is necessary for efficient regeneration and that a localized  
275 population of cells within the blastema structure contains citrullinated histones. With a  
276 known role for histone citrullination in stem cell maintenance, it is intriguing to speculate  
277 that this population of cells with citrullinated histones has pluripotent features required  
278 for efficient tissue repair by acting as a multipotent signaling center.

### 279 ***Padi2*-deficient larvae have impaired wound-induced proliferation**

280       An essential aspect of epimorphic regeneration is remodeling by wound-induced  
281 apoptosis and proliferation (Gauron et al., 2013; Nechiporuk and Keating, 2002; Tseng  
282 et al., 2007). We did not observe a significant change in wound-stimulated apoptosis in  
283 *padi2* mutant larvae (Fig S3 J-L). We assayed cell proliferation using EdU incorporation  
284 and found that mutant larvae had a greater number of EdU-positive cells within the  
285 developing caudal fin than wild-type larvae (Fig 4 A and B), consistent with the

286 observed increase in *padi2*<sup>-/-</sup> developmental fin size (Fig 3 C). Upon wounding, wild-type  
287 larvae had an almost 4-fold increase in proliferative cells within the regenerating fin  
288 compared to the unwounded fins. By contrast, Padi2-deficient larvae exhibited impaired  
289 induction of proliferation, with only a 2-fold induction of proliferation after wounding (Fig  
290 4 C-E). Similarly, *padi2* morpholino knockdown resulted in decreased mitotic index at 24  
291 hpw compared to control injected embryos (Fig S3 M and N). To further quantify  
292 wound-induced proliferation, we focused on the dorsal region of the tail since much of  
293 the developmental proliferation is localized to the ventral fin. In this dorsal region we  
294 observed impaired proliferation in the *padi2*<sup>-/-</sup> larvae compared to wild-type cousins (Fig  
295 4 F and G). These findings suggest opposing roles for Padi2 in developmental fin and  
296 wound-induced proliferation, supporting the idea that these two processes have distinct  
297 modes of regulation.

298 In summary, we identified a new role for citrullination in wound healing and  
299 regeneration. Early calcium flux is a universal injury signal in organisms ranging in  
300 complexity, and while there are many citrullination-independent calcium-induced wound  
301 pathways (Niethammer, 2016), this work identifies one potential regenerative  
302 mechanism downstream of early wound-induced calcium flux (Fig 4 H). We showed that  
303 zebrafish Padi2 has conserved activity and calcium dependence, and that it is  
304 necessary for calcium-mediated histone citrullination in zebrafish larval lysates. Padi2  
305 appears to have opposing roles in developmental fin growth and regeneration with  
306 respect to proliferation and tissue growth and is required for proper neutrophil response  
307 to a wound. The identification of a new, localized population of cells with specifically  
308 wound-induced, Padi2-dependent histone citrullination in the notochord bead suggests

309 that citrullination in this region may play a key role in orchestrating efficient regenerative  
310 growth. The known role of histone citrullination in gene expression and pluripotency  
311 suggests that this small population of cells represents a unique subset of blastemal  
312 cells. A future challenge will be to characterize these cells further including analysis of  
313 their gene expression profile to identify specific downstream effectors of this localized,  
314 regulated histone citrullination. Moreover, this citrullination-deficient vertebrate model  
315 provides a powerful tool for future studies to dissect the role of citrullination in  
316 development, disease, and wound healing, and will aid in the identification of *in vivo*  
317 Padi targets.

318

319 **Figure 1: Characterization of zebrafish Padi2.** (A) Citrullination activity of bacterially  
320 expressed zebrafish Padi2 201a and 202 splice variants in total lysates with and without  
321 calcium. Absorbance of light was measured and expressed as mean ( $\pm$  SEM) relative  
322 light units (RLU), normalized for protein level. Data represent 3 independent replicates.  
323 (B) Citrullination activity of Padi2 201a and individual point mutations in calcium binding  
324 and catalytic amino acids. Fold change of enzymatic activity is shown relative to wild-  
325 type Padi2 201a. Data represent 2 independent replicates and wild-type values are also  
326 represented in A. (C) Schematic of *padi2* gene with exon 7 gRNA sequence highlighted  
327 for CRISPR/Cas9 mutagenesis. gRNA sequence in blue, PAM site in red. (D) Sequence  
328 alignment of wild-type and *padi2*<sup>-/-</sup> 20 bp mutation in exon 7. MwoI restriction site for  
329 genotyping highlighted in pink, predicted early stop codon highlighted in red. (E) RT-  
330 qPCR of *padi2* exon5/6 on individual larvae from a *padi2*<sup>+/-</sup> incross. Data are from three  
331 pooled independent replicates with the means and SEM reported and a one-sample t

332 test performed. (F) Representative western blot for zebrafish Padi2 and Actin from  
333 pooled larvae (representative of 4 experiments). (G) Citrullination activity of pooled  
334 zebrafish lysates expressed as relative light units (RLU). Data are from 3 independent  
335 replicates with the means and SEM reported and an ANOVA performed. (H)  
336 Citrullination activity of pooled embryo lysates during development. Fold change of  
337 enzymatic activity is shown as a ratio of calcium-treated to no calcium for each  
338 condition. Data are from 3 independent replicates. (I) Representative western blot for  
339 zebrafish Padi2 and Actin from pooled zebrafish through stages of development  
340 (representative of 3 and 2 experiments).

341

342 **Figure 2: Padi2 is required for proper regeneration and leukocyte recruitment.** (A)

343 Schematic of regeneration assay. Tail transections were performed through the  
344 notochord (red dotted line) at 2.5 dpf. Fin lengths were measured from the blood  
345 circulation to the end of the fin (blue solid line). (B) Representative bright field images of  
346 regeneration at 3 dpw and quantification of regenerate fin length from 4 independent  
347 replicates with n = 90 +/+, 95 -/-. (C) Representative images of 5 dpf developmental fins  
348 and quantification of developmental fin length from 5 independent replicates with n =  
349 109 +/+, 108 -/-. (D) Schematic of leukocyte quantification region (in blue) at a wound.  
350 (E) Representative images of leukocytes at a wound at 6, 24, and 48 hpw visualized  
351 with mCherry-labeled neutrophil nuclei (*Tg(lyzC:H2B-mCherry)*) and GFP-labeled  
352 macrophage nuclei (*Tg(mpeg1:H2B-GFP)*). Fluorescence channel on the right, merge  
353 with bright-field on the left. Macrophage localization to the periphery of the notochord  
354 bead indicated with an arrow. (F) Quantification of number of neutrophil nuclei at a

355 wound from 3 independent replicates (6 hpw, n = 62 +/+, 57 -/-; 24 hpw, n = 50 +/+, 47 -  
356 -/-; 48 hpw, n = 63 +/+, n=65 -/-). (G) Quantification of number of macrophage nuclei at a  
357 wound from 3 independent replicates (6 hpw, n = 61 +/+, 55 -/-; 24 hpw, n = 48 +/+, 44 -  
358 -/- ; 48 hpw n = 63 +/+, 57 -/-). All quantifications have lsmeans ( $\pm$  SEM) reported with p  
359 values calculated by ANOVA. Scale bars = 100  $\mu$ m.

360

361 **Figure 3: Tail transection stimulates localized Padi2-dependent histone H4**

362 **citrullination.** (A) Representative western blot of *padi2*<sup>-/-</sup> and wild-type whole larvae  
363 lysates showing protein levels of: citrullinated Histone4 (H4cit3), total Histone4 (H4),  
364 total Padi2 (zPadi2), and total Actin (Actin) (representative of 2 replicates). (B)  
365 Representative images of H4cit3 antibody staining in tail transected fins at 20x  
366 magnification. Merge images with bright-field are shown for orientation. Box denotes  
367 region imaged at 60x magnification in (C) showing H4cit3 immunolabel alone. B-C,  
368 Representative images from 3 independent replicates. (D-F) Representative  
369 multiphoton microscopy enface (x,y view) and orthogonal (x, z view is below; y, z view is  
370 to the right) sections of 6 hpw wild-type caudal fins labeled with H4cit3  
371 immunofluorescence (green) in conjunction with either (D) SHG (white) or (E) DAPI  
372 labeled nuclei (blue) and Rhodamine-phalloidin labeled actin (magenta) or (F) DAPI  
373 labeled nuclei (blue) and (*Tg(krt-4:EGFP)*) expressing epithelium (magenta). Note in  
374 (F) fluorophore tag for epithelium crosses into H4cit3 antibody channel at the setting  
375 needed to detect the antibody signal. Arrow indicates nucleus with citrullinated histones  
376 in the notochord region while arrowhead points to one example of a nucleus with  
377 citrullinated histones in the notochord bead. For image presentation, section thickness



378 shown 2  $\mu\text{m}$  for both x and y, 10  $\mu\text{m}$  in z. Representative images from 2 independent  
379 replicates. (G) Representative images of H4cit3 immunostaining in 24 hpw wild-type  
380 cousin (left) and *padi2*<sup>-/-</sup> (right). (H) Quantification of H4cit3 signal area at the notochord  
381 at 24 hpw and 3 dpf (no wound control). (I) Quantification of H4cit3 integrated density in  
382 24 hpw larvae normalized to the average of 3 dpf for each genotype. Data are from 3  
383 pooled independent (J) Quantification of the notochord bead area at 24 hpw from 3  
384 pooled independent replicates. All quantifications have the lsmeans ( $\pm$ ) SEM reported  
385 and p values calculated by ANOVA (H-J: 24 hpw, n = 38 +/+, 41 -/-; 3 dpf n = 25 +/+, 25  
386 -/-). Scale bars = 100  $\mu\text{m}$  in B, G; 50  $\mu\text{m}$  in C; 20  $\mu\text{m}$  in D, E, F.

387

388 **Figure 4: Wound-induced proliferation is perturbed in Padi2-deficient larvae.** (A,C)

389 Representative images of 6-hour EdU pulsed larvae in (A) developmental, unwounded  
390 or (C) 66 hpw fins. Merged images of EdU (green) and DAPI (white) on the left and  
391 single EdU (white) image on the right. (B,D) Quantification of EdU-positive cells in the  
392 fin. (E) Number of EdU-positive cells in the fin normalized to corresponding no wound  
393 conditions. (F) Representative images of the dorsal half of 6-hour EdU-pulsed fins. (G)  
394 Quantification of EdU-positive cells within the dorsal region of the fin. All data are from 3  
395 pooled independent replicates with the lsmeans and SEM reported and p values  
396 calculated by ANOVA (no wound, n = 39 +/+, 39 -/- ; 66 hpw n = 47 +/+, 47 -/-). Scale  
397 bars = 100  $\mu\text{m}$ . (H) A proposed model depicting how the early wound epithelial calcium  
398 flux might activate (dashed arrow) Padi2 to catalyze citrullination events that, either  
399 directly or indirectly (left question mark), regulate neutrophil (purple) recruitment to the  
400 wound, possibly mediated by the Cxcl8 pathway or ECM modification. Concomitantly,

401 wound-dependent Padi2 citrullination of histones (green nuclei) within a subset of cells  
402 in the notochord bead (pink) potentially stimulates, through yet to be determined  
403 mechanisms (right question mark), regenerative proliferation.

404

405

## 406 **Materials and methods**

### 407 **Zebrafish maintenance and handling**

408 All protocols in this study were approved by the University of Wisconsin-Madison  
409 Animal Care and Use Committee (IACUC). Adult zebrafish were maintained on a  
410 14h:10h light/dark schedule. Fertilized embryos were transferred and maintained in E3  
411 buffer at 28.5°C. This study utilized adult AB and NHGRI-1 (LaFave et al., 2014) fish  
412 (obtained from the Zebrafish International Resource Center (ZIRC)) as well as  
413 previously published transgenic lines *Tg(mpeg1:H2B-GFP)* (Miskolci et al., 2019),  
414 *Tg(lyzc:H2B-mCherry)* (Yoo et al., 2012b), *Tg(krt4:EGFP)* (Yoo et al., 2012a), and  
415 *Tg(lepb:EGFP)* (Kang et al., 2016).

### 416 **Zebrafish and Human PADI alignment**

417 Sequence alignments were performed using the EMBOSS Water pairwise  
418 sequence alignment algorithm (Smith and Waterman, 1981). Predicted transcripts are  
419 listed in Table 1. Transcript annotations are from GRCz10 with transcript 201a  
420 indicating a sequence slightly divergent from GRCz10's transcript 201.

421 **Table 1. Annotated PADI transcripts used in this study.**

| Name       | Transcript ID        | Genome assembly |
|------------|----------------------|-----------------|
| zPadi2 202 | ENSDART00000140943.3 | GRCz11          |
| zPadi2 203 | ENSDART00000140943.2 | GRCZ10          |
| zPadi2 201 | ENSDART00000064842.6 | GRCz11          |

|            |                      |        |
|------------|----------------------|--------|
| zPadi2 201 | ENSDART00000064842.5 | GRCz10 |
| zPadi2 202 | ENSDART00000127766.2 | GRCz10 |
| hPADI2 202 | ENST00000375486.8    | GRCh38 |

422

### 423 **Generation of a padi2 mutant line and genotyping**

424 Zebrafish CRISPR/Cas9 injections were performed as previously described in  
425 our lab (LeBert et al., 2018; LeBert et al., 2015). Guide RNA (gRNA) for zebrafish Padi2  
426 (ENSDARG00000044167) was designed using CHOPCHOP (Montague et al., 2014).

427 Exon 7 target sequence: GGGAACAGACACGCTGACGC

428 The pT7 gRNA was prepared as previously described (LeBert et al., 2018). The  
429 gRNA and Cas9 protein (New England Biolabs) were injected into one-cell stage  
430 NHGRI-1 embryos in a 2 nl volume consisting of ~50 ng/ $\mu$ l gRNA and ~300 nM Cas9.  
431 To confirm genome editing by the gRNA, genomic DNA was extracted from 2 days post  
432 fertilization (dpf) embryos, amplified using the primers listed below, and separated on a  
433 3% MetaPhor gel (Lonza).

434 Padi2 F: CTGATACATGGCACAACCTACG

435 Padi2 R: GAAAACCAGCAAGCAGAGAAAGTT

436 Sequences of F0 mosaic cuts were confirmed by TOPO cloning (Invitrogen) and  
437 sequencing. Clutches of larvae with confirmed CRISPR cuts were grown to adulthood.  
438 Adult F0 CRISPR injected fish were screened for germline mutations by testing their  
439 individual outcrossed offspring (2-5 dpf) using the primers listed above and Indel  
440 Detection and Amplicon Analysis (IDAA) (Yang et al., 2015). Sequences were analyzed  
441 using Peak Studio (McCafferty et al., 2012). Mutation sequence was confirmed by  
442 TOPO cloning and sequencing.

443 Heterozygous *padi2* zebrafish were maintained by outcrossing the CRISPR  
444 mutants to AB wild-type background zebrafish and genotyped by genomic DNA isolated  
445 from fin clips and amplified using the primers listed above. PCR product was either  
446 separated on a 2% agarose gel for 3 hours or digested overnight with MwoI (New  
447 England Biolabs) and separated on an agarose gel to determine individual fish  
448 genotypes. For experimental purposes, F2 or F3 heterozygotes were incrossed for the  
449 generation of adult homozygous mutant and wildtype siblings. These adults were then  
450 incrossed to produce *padi2*<sup>-/-</sup> and wild-type clutches, referred to as cousins, which were  
451 only used for experimentation and not for the maintenance of subsequent generations.

#### 452 **qRT-PCR**

453 RNA and DNA were extracted from individual 2 dpf embryos from a *padi2*<sup>+/-</sup>  
454 incross using TRIZOL (Invitrogen) following the manufacturer's protocol. Embryos were  
455 genotyped using GoTaq (Promega) as described above and 2-3 embryos of each  
456 genotype were used for cDNA production using Superscript III First Strand Synthesis  
457 System with Oligo(dT) (Thermo Fisher Scientific). qPCR was performed using FastStart  
458 Essential Green Master (Roche) and a LightCycler96 (Roche). Primers for *padi2* and  
459 *ef1a* are listed below. Data were normalized to *ef1a* using the  $\Delta\Delta C_t$  method (Livak and  
460 Schmittgen, 2001) and represented as fold change over wild-type embryos.

461 For evaluation of *padi2* mRNA expression during wounding, incrosses of F3 or  
462 F4 adult wild-type and *padi2*<sup>-/-</sup> siblings were done to produce offspring cousins  
463 homozygous for the *padi2* mutation or wild-type. Fin samples were amputated at the  
464 line of the blood circulatory loop and 50-100 fins were pooled and flash frozen, with  
465 equivalent sample sizes used per replicate. RNA was extracted from fin tissue from 24

466 hpw and unwounded, 3 dpf, larvae, as described above. Primers for *padi2* and *rps11*  
467 (de Oliveira et al., 2013) are listed below. Data were normalized to *rps11* and  
468 represented as fold change over wild-type, unwounded, age-matched control fins.

469 Padi2 exon5 qRT-PCR F: TAATGGCCATGGTGCAGTTC

470 Padi2 exon6 qRT-PCR R: ATGGTCCATTAGTGCGCAAC

471 Ef1a qRT-PCR F: TGCCTTCGTCCCAATTTCAG

472 EF1a qRT-PCR R: TACCCTCCTTGCGCTCAATC

473 Rps11 qRT-PCR F: TAAGAAATGCCCTTCACTG

474 Rps11 qRT-PCR R: GTCTCTTCTCAAACGGTTG

#### 475 **Generation of zebrafish *padi2* clones and point mutations**

476 Padi2 splice variants were amplified with Pfu Turbo DNA polymerase (Agilent)  
477 from cDNA using In-Fusion primers listed below. PCR products and a pCS2+8 vector  
478 (Gokirmak et al., 2012) (Addgene) were digested with XbaI and BamHI (Promega) and  
479 ligated at room temperature using Takara ligation kit for long fragments.

480 Padi2 cloning R, with XbaI: GGATCG TCTAGATTACAGCTCCAGGTTCCACC

481 Padi2 cloning F transcript 201: CGATCCGGATCCATGGTGTCCCGTCGATCTCTTAC

482 Padi2 cloning F transcript 202: CGATCCGGATCCATGAATGTTTCGCAGGAGC

483 Both cDNA transcripts were cloned into pTRCHisA vector (Invitrogen) for N-terminal  
484 polyhistidine (his) tagging and expression in *E. coli* (BL21(DE3)pLysS Competent cells)  
485 using primers listed below. Constructs were inserted into the vector cut with BamHI and  
486 HindIII (Promega) using In-Fusion HD cloning kit (Clontech). Point mutations were  
487 made with complementary primers (listed below) in pTRCHisA-*padi2* vectors using  
488 QuikChange II Site-Directed Mutagenesis Kit (Agilent).

489 Catalytic C→A F: GTGAAGTTCACGCCGGGTCCAATGTTC  
490 Catalytic C→A R: GAACATTGGACCCGGCGTGAACCTCAC  
491 Ca1 binding Q→A F: ATCGCTGGATGGCGGATGAGCTTGAGTT  
492 Ca1 binding Q→A R: AACTCAAGCTCATCCGCCATCCAGCGAT  
493 Ca1 binding E→A F: GGATGAGCTTGCGTTTGGTTACATTG  
494 Ca1 binding E→A R: CAATGTAACCAAACGCAAGCTCATCC  
495 Ca1 binding E→A F: TTTCGGTAATCTGGCGGTCAGTCCACCA  
496 Ca1 binding E→A R: TGGTGGACTGACCGCCAGATTACCGAAA  
497 Ca2 binding D→A F: TGTTGTCCTGGCTTCTCCTCGTGAT  
498 Ca2 binding D→A R: ATCACGAGGAGAAGCCAGGACAACA

#### 499 **Antibody production and western blotting**

500 The anti-zebrafish Padi2 antibody was generated in rabbits using combined full  
501 length 201a and 202 variants fused to 6x poly-histidine in the pTRCHisA vector. Each  
502 immunogen was purified from BL21 *E. coli* lysates using a nickel-nitrilotriacetic acid  
503 superflow resin (Qiagen) then combined and sent for anti-sera production (Covance).  
504 For western blotting, 50-100 ~2 dpf or 5 dpf larvae were pooled and deyolked in  
505 calcium-free Ringer's solution via gentle disruption with a p200 pipette. Lysates from 2  
506 hpf and 7 hpf larvae were not deyolked; samples were instead dechorionated on a petri  
507 dish coated with 2% agarose and then rinsed with PBS. Larvae were washed twice with  
508 phosphate-buffered saline (PBS) and stored at -80°C until samples were lysed by  
509 sonication in 20mM Tris pH 7.6, 0.1% Triton-X-100, 0.2 mM phenylmethylsulfonyl  
510 fluoride (PMSF), 1 µg/mL Pepstatin, 2 µg/mL Aprotinin, and 1 µg/mL Leupeptin at 3 µL  
511 per larvae while on ice and clarified by centrifugation. Protein concentrations were

512 determined using a bicinchoninic acid protein assay kit (Thermo Fisher Scientific),  
513 according to the manufacturer's instructions. Equal amounts of total protein were loaded  
514 on 6-20% gradient SDS-polyacrylamide gels and transferred to nitrocellulose. For  
515 citrullination analysis by western of whole zebrafish lysates, methods for the  
516 citrullination colorimetric assay were followed, as described below, with the addition of  
517 dilution buffer in place of BAEE (N<sub>α</sub>-Benzoyl-L-arginine ethyl ester hydrochloride in 100  
518 mM Tris pH 7.4). The reaction was stopped after 90 minutes by boiling samples in SDS-  
519 PAGE sample buffer. zPadi2 rabbit anti-serum was used at 1:500 dilution, anti-Histone  
520 H4 (citrulline 3) (EMD-Millipore) at 1:50, anti-actin (ac15; Sigma) at 1:1000, and anti-  
521 Histone H4 (EMD-Millipore) at 1:1000. Western blots were imaged with an Odyssey  
522 Infrared Imaging System (LI-COR Biosciences).

### 523 ***padi2* mRNA re-expression**

524 *padi2*-201a cloned into pCS2+8 (described above) was linearized using NotI  
525 restriction digest and RNA was *in vitro* transcribed using the mMessage mMachine Sp6  
526 kit (Ambion). RNA was cleaned up using an RNeasy Minikit column (Qiagen) and  
527 injected into single cell embryos (3nl of 100ng/ul). Embryo lysates were collected as  
528 described for western blotting at 2dpf and 5dpf.

### 529 ***In vitro* citrullination colorimetric assay**

530 Zebrafish Padi2 constructs and point mutations were expressed in BL21 *E. coli*  
531 cells. Lysates were prepared on ice by sonication in 20mM Tris pH 7.6, 0.1% Triton-X-  
532 100, 0.2 mM phenylmethylsulfonyl fluoride (PMSF), 1 µg/mL Pepstatin, 2 µg/mL  
533 Aprotinin, and 1 µg/mL Leupeptin and clarified by centrifugation. Bacterial lysates were  
534 aliquoted and frozen at -80°C. Lysates from zebrafish larvae were prepared as

535 described above for western blotting and used at equivalent amounts. Assay performed  
536 as previously described (Nakayama-Hamada et al., 2005). In short, 12.5 $\mu$ L lysate was  
537 incubated with 12.5  $\mu$ L 4X reaction buffer (400 mM Tris pH 7.4,  $\pm$  80 mM CaCl<sub>2</sub>, 20 mM  
538 DTT), 12.5  $\mu$ L 80 mM BAEE (N $\alpha$ -Benzoyl-L-arginine ethyl ester hydrochloride in 100 mM  
539 Tris pH 7.4), 12.5  $\mu$ L dilution buffer (10 mM Tris pH 7.6, 150 mM NaCl, 2mM DTT) for 1  
540 hour at 37°C. Reaction was stopped by the addition of 33  $\mu$ M EDTA final concentration.  
541 Reactions were diluted 1:10 for an 8 mM BAEE final concentration and 50  $\mu$ L aliquots  
542 were done in triplicate in a 96-well plate. 150  $\mu$ L colorimetric buffer (composed of 1 mL  
543 buffer A (80 mM diacetyl monoxime, 2 mM thiosemicarbazide) and 3 mL buffer B (3 M  
544 phosphoric acid, 6 M sulfuric acid, 2 mM ammonium iron (III) sulfate)) were added to  
545 each well and incubated at 95°C for 15 minutes, absorption was read at 540 nM.  
546 Relative light units were normalized to western blot densitometry using Odyssey  
547 Infrared Imaging System (LI-COR Biosciences).

#### 548 **Morpholino injections**

549 Morpholino oligonucleotides (Genetools) were designed to the intron1/exon2  
550 border of *padi2*. Morpholinos were resuspended in water to a final concentration of 1  
551 mM. Morpholinos were diluted to a final concentration of 100  $\mu$ M and 3 nl injection mix  
552 was injected into one-cell stage embryos which were subsequently maintained at  
553 28.5°C. Morpholino sequences used: *padi2* MO: 5'-  
554 GAGCACATCTGGAATGGGAATATAT; control MO: 5'-  
555 CCTCTTACCTCAGTTACAATTTATA-3'.

#### 556 **Regeneration assays**



557 For larval regeneration assays, incrosses of F3 or F4 adult wild-type and *padi2*<sup>-/-</sup>  
558 siblings were done to produce offspring cousins homozygous for the *padi2* mutation or  
559 wild-type. Dechorionated larvae were transferred to 35 mm milk-coated plates. Larvae  
560 were washed twice in E3 and wounded in a final 0.24 mg/mL tricaine (ethyl 3-  
561 aminobenzoate, Sigma)/E3 solution. Tail transections were performed on ~2.5 dpf  
562 larvae with a surgical blade (feather no 10) roughly four vacuolated cells from the  
563 posterior end of the notochord. Larvae were again washed 3 times with E3 and allowed  
564 to regenerate for 3 days post-wounding (dpw), at which point larvae were fixed with 4%  
565 paraformaldehyde (PFA; Sigma-Aldrich) in PBS at 4°C overnight. Fins were imaged on  
566 a Zeiss Zoomscope (EMS3/SyCoP3; Zeiss; 1x Plan-NeoFluor Z objective) with an  
567 Axiocam Mrm CCD camera using ZEN pro 2012 software (Zeiss). Regenerate length  
568 was measured from the edge of the blood vessel to the caudal edge of the tail fin using  
569 the FIJI image analysis software (Schindelin et al., 2012)). Unwounded, 5 dpf larvae fin  
570 lengths were measured as a developmental control. Fin transections were performed on  
571 MO injected larvae similarly to as described above with amputation adjacent to the  
572 notochord, without causing damage to the notochord. Regenerated fins and  
573 developmental controls were measured from the caudal tip of the notochord to the  
574 caudal edge of the tail fin.

### 575 **Immunofluorescence, microscopy and analysis**

576 Images always shown with anterior to the left.

#### 577 Neuromuscular labels

578 Immunostaining was performed on cousin offspring from incrossed adult F2 wild-  
579 type siblings and incrossed *padi2*<sup>-/-</sup> sibling zebrafish. 5 dpf larvae were fixed in 4% PFA,

580 0.125 M sucrose, and 1X PBS overnight at 4°C. For detection of slow muscles, larvae  
581 were washed 3 times with 0.1% PBS-Tween20 and incubated in 0.1% w/v collagenase  
582 type 1A (Sigma) in PBS at 37°C for 1.5 hours, followed by 3 washes in PBSTD (0.3%  
583 TritonX, 1% DMSO in PBS). Larvae were blocked for 2 hours at room temperature (RT)  
584 in PBSTD with 2% BSA and 4% goat serum. Monoclonal mouse anti-myosin heavy  
585 chain antibody (F59) (DSHB) (Miller et al., 1985) was used at 1:20 in block buffer and  
586 incubated overnight in 4°C. Larvae were washed five times in PBSTD and secondary  
587 Dylight 488 donkey anti-mouse IgG antibody (Rockland Immunochemicals) was used at  
588 1:250 in block buffer overnight at 4°C. Final five washes were done in PBSTD. Images  
589 were acquired on a spinning disk confocal (CSU-X; Yokogawa) on a Zeiss Observer Z.1  
590 inverted microscope and an EMCCD evolve 512 camera (Photometrics) with a Plan-  
591 Apochromat NA 0.8/20x air objective and collected as z-stack of 1 µm optical sections  
592 at 512x512 resolution. Images were z-projected with using Zen 2.3 lite software (Zeiss).

593 For visualization of fast muscle, fixed fish were washed with PBS 3 times  
594 followed by three washes in PBS with 0.1% Tween20. Larvae were permeabilized with  
595 PBS 2% PBSTx (20% Triton-X-100 in 1X PBS) for 1.5 hours with gentle rocking. Fish  
596 were then incubated with Rhodamin-phalloidin (Invitrogen) diluted 1:100 in 2% PBSTx  
597 at 4°C overnight. Fish were rinsed in fresh 2% PBSTx followed by several washes in  
598 0.2% PBSTx. Imaging was performed on the spinning disk microscope with a Plan-  
599 Apochromat NA 0.8/20x air objective (centered on cloaca) with 1 µm optical sections.

600 For neuromuscular junction visualization, fix was washed off with three PBS  
601 washes. The skin was peeled with fine forceps (Dumont #55 dumostar, Fine Science  
602 Tools) starting above the swim bladder and removed down to the fin. Skinned larvae

603 were incubated in 0.1% w/v collagenase type 1A at RT for 15 minutes with gentle  
604 rocking followed by three washes in PBS. For detection of acetylcholine receptors  
605 (AChR), larvae were incubated for 30 minutes at RT 10  $\mu$ g/ml Alexa 594 conjugated  $\alpha$ -  
606 bungarotoxin (Thermo Fisher Scientific) diluted in incubation buffer (IB: 0.1% sodium  
607 azide, 2% BSA, 0.5% Triton-X-100 in PBS, pH7.4). Embryos were rinsed three times in  
608 IB. Mouse anti-synaptic vesicle glycoprotein 2A antibody (SV2) (DSHB) (Buckley and  
609 Kelly, 1985) was used at 1:50 in IB overnight at 4°C. Larvae were washed 5 times in IB  
610 and incubated with secondary Dylight 488 donkey anti-mouse IgG antibody (Rockland  
611 Immunochemicals) at 1:250 in IB for 4 hours at RT or 4°C overnight. Final washes were  
612 done in IB before imaging on a spinning disk microscope with an EC Plan-NeoFluar NA  
613 0.75/40x air objective (Zeiss) (centered around the cloaca with 2x1 tile images and 1  $\mu$ m  
614 optical section z-stacks). To quantify colocalization of signal, maximum intensity  
615 projections were analyzed in FIJI using the plugin ComDet v3.7 for spot localization  
616 (<https://github.com/ekatruxha/ComDet/wiki>). Particles were threshold as approximate  
617 size being 5 pixels, intensity threshold for SV2 between 4-5 and  $\alpha$ -BTX between 2-3  
618 and a 6 pixel max distance between particles.

### 619 Histone citrullination

620 Immunostaining was performed on offspring cousins from incrossed adult F3  
621 wild-type siblings and incrossed *padi2*<sup>-/-</sup> siblings. To identify histone citrullination, larvae  
622 were fixed in a solution of 1% NP-40, 0.5% Triton-X, and 1.5% PFA in PBS at 4°C  
623 overnight. The following day fix was replaced with a block solution of 2.5% BSA, 0.5%  
624 Tween-20, 5% goat serum in PBS. Samples were blocked for at least 2.5 hours at room  
625 temperature followed by the addition of poly-clonal rabbit anti-histone H4 (citrulline 3)

626 antibody (EMD Millipore) used at 1:100 and incubated overnight at 4°C. For time course  
627 experiments, samples were kept in block at 4°C until the final sample was prepared, at  
628 which time all samples were blocked at room temperature before the addition of the  
629 primary antibody. Samples were washed 3 times in PBS at room temperature for 5  
630 minutes each and secondary Dylight 488 donkey anti-rabbit (Rockland  
631 Immunochemicals) or Alexa Fluor 568 goat anti-rabbit IgG antibodies (Invitrogen) were  
632 used at 1:250 in block buffer overnight at 4°C. When indicated, Rhodamine-phalloidin  
633 (Invitrogen) and 10 mg/mL DAPI (4',6-diamidino-2-phenylindole; Sigma) were added  
634 with secondary antibodies at 1:100 and 1:10,000 dilutions, respectively. Finally, 4  
635 washes were done in PBS. Images were acquired on a laser-scanning confocal  
636 microscope (FluoView FV1000; Olympus) with an NA 0.75/20x or PLANAPO NA  
637 1.45/60x oil objective and FV10-ASW software (Olympus). 20x images used for  
638 quantification were acquired as Z-stacks with 25, 1 um optical slices at 640x640  
639 resolution. Alternatively, images were acquired using multiphoton microscopy. For this,  
640 caudal fins of fixed, PTU-treated, labeled larvae were removed from the trunk with a  
641 scalpel blade (Feather #15) then imaged in a 50 mm coverglass (#1.5) bottom dish  
642 (MatTek, Ashland MA) in PBS, as previously described (LeBert et al., 2016; LeBert et  
643 al., 2015). A second coverslip over the glass bottom depression minimized sample  
644 movement. The fins were imaged on a custom-built multiphoton microscope (Conklin et  
645 al., 2011; LeBert et al., 2016) at the Laboratory for Optical and Computational  
646 Instrumentation using a 40X long working distance water immersion lens (1.2 NA,  
647 Nikon, Melville NY). All signals were detected sequentially using a H7422P-40 GaAsP  
648 Photomultiplier Tube (PMT) (Hamamatsu, Japan). The backwards SHG signal was

649 collected with the multiphoton source laser (Chameleon Ultrall, Coherent Inc., Santa  
650 Clara, CA) tuned to 890 nm, with a 445/20 nm bandpass emission filter (Semrock,  
651 Rochester NY). The fluorescent signal from H4cit3 antibody was collected using a either  
652 a 520/35 nm bandpass emission filter (Semrock) for the Dylight 488 donkey anti-rabbit  
653 secondary antibody (Rockland Immunochemicals) or a 615/20 nm bandpass emission  
654 filter (Semrock) for the Alexa Fluor 568 goat anti-rabbit secondary antibody (Invitrogen).  
655 The 615/20 emission filter was used to collect the fluorescent signal from the  
656 Rhodamine-Phalloidin while the 520/35 nm emission filter was used to detect the  
657 krt4:EGFP and lep4:EGFP fluorescence. DAPI fluorescence was excited with the laser  
658 tuned to 740 nm and the emission collected using the 445/20 filter. Brightfield images  
659 were simultaneously collected using a separate photodiode-based transmission  
660 detector (Bio-Rad, Hercules CA). Data were collected as z-stacks with optical sections 2  
661 microns apart, at 512 x 512 resolution.

#### 662 Mitotic index

663 For evaluation of cells undergoing mitosis, 24 hpw and 3 dpf MO-injected larvae  
664 were fixed with 1.5% PFA in 0.1M PIPES, 1.0 mM, 2 mM EGTA overnight at 4°C and  
665 immunolabeled with phosphorylated histone H3 (serine10) antibody (Millipore). To  
666 remove fixation solution, larvae were washed with PBS three times and placed in  
667 methanol at -20°C overnight. Samples were rehydrated in subsequent 5 minute washes  
668 at ratios of 2:1, 1:1, 1:2 methanol:PBSTx (PBS with 0.2% Triton-X), and a final PBSTx  
669 wash. Larvae were incubated in 0.15 M glycine in PBS for 10 minutes at room  
670 temperature followed by 3 PBSTx washes. Fish were blocked in 1% BSA in PBSTx for 1  
671 hour at room temperature. Phosphorylated histone H3 (serine10) antibody diluted 1:300

672 in block was incubated overnight at 4°C. Samples were washed for 15-30 minutes in  
673 block, twice in PBSTx, and another wash in block. Incubation with Dylight donkey anti-  
674 rabbit 488 secondary was used, followed by four washes in PBSTx. Samples were  
675 imaged and quantified on the laser-scanning confocal microscope with a 20x lens, as  
676 described above.

### 677 **Leukocyte Imaging**

678 *padi2*<sup>+/-</sup> adults were crossed to AB wild-type zebrafish labeled with macrophage  
679 nuclei (*Tg(mpeg1:H2B-GFP)*) or neutrophil nuclei (*Tg(lyzc:H2B-mCherry)*) and  
680 subsequently incrossed to produce homozygous, fluorescently labeled adults.  
681 Experiments were performed on wild-type cousins and *padi2*<sup>-/-</sup> larvae resulting from  
682 incrossed adult transgenic siblings. Wounding was performed as described above and  
683 larvae were fixed with 1.5% PFA in 0.1 M PIPES (Sigma-Aldrich), 1 mM MgSO<sub>4</sub> (Sigma-  
684 Aldrich), and 2 mM EGTA (Sigma-Aldrich) overnight at 4°C. Wounds were imaged on a  
685 Zeiss Zoomscope, as above. Leukocyte numbers were counted by hand in the region  
686 past the blood circulatory loop. Whole larvae images were acquired on a spinning disk  
687 confocal (CSU-X; Yokogawa) on a Zeiss Observer Z.1 inverted microscope and an  
688 EMCCD evolve 512 camera (Photometrics) with a Plan-Apochromat NA 0.8/20x air  
689 objective (5 μm optical sections, 5x1 tiles, 2355x512 resolution).

### 690 **EdU and apoptosis labeling**

691 Immunostaining was performed on offspring “cousins” from incrossed adult F3  
692 wild-type siblings and incrossed *padi2*<sup>-/-</sup> siblings. Proliferation in the fin was measured  
693 using Click-iT Plus EdU Imaging Kit (Life Technologies). Larvae were incubated in 10  
694 μM EdU (5-ethynyl-2'-deoxyuridine) solution in E3 for 6 hours with slight agitation.

695 Wounded fish were incubated from 60-66hpw along with age matched unwounded  
696 controls. Larvae were fixed in 4% PFA in PBS overnight at 4°C and stored in methanol  
697 at -20°C until staining. Staining protocol was conducted according to manufacturer's  
698 instructions. EdU-stained larvae were also incubated with rabbit anti-active Caspase3  
699 antibody (BD Biosciences) at 1:200 in block (PBS, 1% DMSO, 1% BSA, 0.05% Triton-X,  
700 1.5% goat serum) followed by incubation with Alexa 550 goat anti-rabbit secondary  
701 antibody and 0.01 mg/mL DAPI (Sigma). Immunofluorescence images were acquired on  
702 a spinning disk confocal (CSU-X; Yokogawa) on a Zeiss Observer Z.1 inverted  
703 microscope with an EMCCD evolve 512 camera (Photometrics) and a Plan-Apochromat  
704 NA 0.8/20x air objective, as Z-stacks, 3 µm optical sections, and with 512x512  
705 resolution.

#### 706 **Image analysis/processing**

707 Image analysis was performed on FIJI. For experiments where fluorescence  
708 intensity was quantified, no adjustments were made to the images prior to analysis. For  
709 Histone H4cit3 analysis, a region of interest 92 x 93 microns was centered around the  
710 notochord, as determined by the corresponding bright-field image. Immunostained  
711 images were z-projected as a maximum intensity projection and the integrated density  
712 in the region of interest (ROI) was determined. Images were thresholded using the  
713 threshold plugin using auto-thresholding with the "Intermodes" method in Fiji (Prewitt  
714 and Mendelsohn, 1966) and the total area within the ROI was determined for particles  
715 larger than 8 pixels. For presentation purposes, images were processed to remove  
716 background using despeckling. Notochord bead area was determined in FIJI by  
717 outlining this structure as determined by examination of the optical bright-field slices.

718 Total neutrophil numbers were determined using Imaris (Bitplane) with the spots  
719 function as defined by a 10  $\mu\text{m}$  diameter in the XY plane and a Z-diameter of 20  $\mu\text{m}$ .  
720 Total macrophage numbers were counted by hand using Z-projected images in Zen 2.3  
721 lite software. For total leukocyte quantifications, leukocytes within the yolk sac and heart  
722 were excluded.

723 For spatial assessment of nuclei with citrullinated histones, three dimensional  
724 reconstructions and slices were constructed using Imaris (Bitplane, Oxford Instruments,  
725 UK). Videos of z-stack scans and 3D rotations were made in Imaris, annotated in FIJI  
726 using "[Annotation to overlay1.3](#)" plugin  
727 ([https://www2.le.ac.uk/colleges/medbiopsych/facilities-and-services/cbs/AIF/software-  
728 1/imagej-macos#Annotation](https://www2.le.ac.uk/colleges/medbiopsych/facilities-and-services/cbs/AIF/software-1/imagej-macos#Annotation)) and converted to MP4 using HandBrake (v1.2.2) software  
729 (The HandBrake Team, <https://handbrake.fr/>).

730 For EdU analysis, images were 3D reconstructed using Imaris software  
731 (Bitplane). The number of EdU-positive cells were quantified in the fin region posterior  
732 of the blood circulatory loop with the spots function as defined by an XY-diameter of 7  
733  $\mu\text{m}$  and a Z-diameter of 14  $\mu\text{m}$ . The level of apoptosis activation at the wound was  
734 determined by outlining the fin past the blood circulation using the corresponding bright-  
735 field image. In FIJI, total threshold area for active-Caspase3 signal in the wound was  
736 determined using the threshold plugin in Fiji by auto-thresholding with the "Yen Dark"  
737 method (Yen et al., 1995) for particles larger than 3 pixels.

### 738 **Statistical analysis**

739 For all statistical analyses, at least three independent replicates were conducted.  
740 For data in Fig 1 G, analysis was done using one-way ordinary analysis of variance



741 (ANOVA) with a Holm-Sidak's multiple comparisons test. To examine mutant survival,  
742 Mendelian ratio was confirmed for both larvae and adult offspring from a heterozygous  
743 incross by Chi-squared tests. For all other quantitative experiments, data were pooled  
744 from the independent replicates and results were summarized in terms of least-squared  
745 adjusted means (lsmeans) and standard errors (Vincent et al., 2016). Results were  
746 analyzed using ANOVA with a Tukey's multiple comparisons test. Graphical  
747 representation shows individual data points color coded to reflect replicates. Statistical  
748 analysis and graphical representations were done using R version 3.4 and GraphPad  
749 Prism version 6.

750

#### 751 **Summary of supplemental material.**

752 Supplemental material includes additional data characterizing the zebrafish *Padi2*  
753 transcripts and proteins (Fig. S1), additional characterization of the *padi2* mutant (Fig  
754 S2), and additional non-wound phenotypes observed in the mutant and supporting  
755 morpholino data (Fig. S3). We also include 6 videos that characterize the 3 dimensional  
756 context of the citrullinated histones post injury.

757

#### 758 **Supplemental material**

759 **Figure S1: Characterization of zebrafish Padi2.** (A) Schematics of *padi2* transcripts,  
760 with exons represented by solid boxes and introns by connected lines (slashes indicate  
761 shortening of relative length for display purposes). Left, list of the corresponding last 7  
762 digits of Ensembl ID from GRCz11 and GRCz10 genome assemblies (full Ensemble IDs  
763 listed in materials and methods). Right, list of the names based on GRCz10 used to

764 reference the transcripts. Cloned transcripts discussed in this paper are in green and  
765 arrows highlight exon 10. (B) Full amino acid sequences of human PAD2 and predicted  
766 zebrafish Padi2 splice variants (201a and 202). Amino acids are highlighted (as  
767 indicated in key) to demonstrate calcium binding, catalytic residues, and substrate-  
768 binding residues. Black arrow heads indicate amino acids referred to in Fig 1 B and S1  
769 F. (C) Full western blot (from Fig 1 F) of pooled larvae probed with antibodies against  
770 zebrafish Padi2 and Actin. Wild-type and *padi2*<sup>-/-</sup> lysates were probed. Arrow  
771 demonstrates expected size of Padi2 transcripts at ~75 and 80 kDa and asterisk marks  
772 ~200 kDa species. Representative blot from 4 replicates. (D) Western blot of pooled  
773 wild-type larvae probed with pre-immune serum and Actin antibody. (E) zPadi2 western  
774 blot of pooled 2 dpf larvae. Lane 1, wild-type; lane 2, *padi2*<sup>-/-</sup>; lane 3, *padi2* 201a mRNA-  
775 injected *padi2*<sup>-/-</sup> larvae. (F) Citrullination activity of Padi2 202 and individual point  
776 mutations in select calcium-binding and catalytic amino acids (colors correspond to  
777 highlighted residues in B). Fold change of enzymatic activity normalized to wild-type  
778 Padi2 202. Data represent 2 independent experiments and wild-type values are also  
779 represented in Fig 1 A.

780

781 **Figure S2: Homozygous *padi2* mutants are viable and have increased**  
782 **neuromuscular junctions.** (A) Genotype frequency at 5 dpf larvae of incrossed *padi2*  
783 heterozygotes. (B) Genotype frequency of adult offspring of incrossed *padi2*  
784 heterozygotes. Data in A and B are from four and six clutches, respectively, and  
785 analyzed by Chi-squared tests. (C) Representative images of slow-muscle fibers  
786 immunostained with  $\alpha$ -MyHC antibody in the trunk of 5 dpf larvae from 3 independent

787 replicates. (D) Representative images of the trunk of phalloidin-stained 5 dpf larvae for  
788 visualization of F-actin in fast-muscle fibers. Wild-type cousin (left) and *padi2*<sup>-/-</sup> (right)  
789 from 3 independent replicates. (E) Neuromuscular junctions are labeled with  $\alpha$ -SV2  
790 (green, presynaptic vesicles),  $\alpha$ -BTX (red, postsynaptic AChRs), and merge (synapses)  
791 in wild-type cousins (top) and *padi2*<sup>-/-</sup> (bottom) larvae at 5 dpf. (F) Quantification of the  
792 number of SV2 puncta, AChR puncta, and synapses in a single myotome in the trunks  
793 of larvae. Data are from three pooled independent replicates with the means ( $\pm$ ) SEM  
794 and p values calculated by ANOVA reported. Each symbol represents a single myotome  
795 and measurements were taken from two myotomes per larva (n = 100 myotomes from  
796 50 wild-type larvae, n = 114 myotomes from 57 *padi2*<sup>-/-</sup> larvae). Scale bars = 50  $\mu$ m.

797

798 **Figure S3: Padi2-deficient larvae show regeneration defects.** (A) RT-qPCR of *padi2*  
799 exon5/6 on pooled fin extracts from 24 hpw and no wound controls (3dpf) normalized to  
800 wildtype, no wound fins. Data are from three pooled independent replicates with the  
801 means and SEM reported and a one-sample t test performed. (B) Quantification of  
802 regenerative and developmental fin length after morpholino (MO) knockdown of *padi2*.  
803 Data from 5 independent replicates with 3 dpw (n = 90 control MO, n = 113 *padi2* MO)  
804 and 5 dpf (n = 104 control MO, n = 103 *padi2* MO). (C) Quantification of neutrophils in  
805 whole larvae from 3 independent replicates, (n = 30 +/+, 29 -/- at 2 dpf; n = 30 +/+, 30 -/-  
806 at 3 dpf). (D) Quantification of neutrophil numbers in developmental, unwounded fins.  
807 Pooled from five independent replicates (n = 88 +/+, 78 -/- at 2 dpf and n = 79 +/+, 75 -/-  
808 at 3 dpf). (E) Quantification of macrophage numbers in whole larvae from 3 independent  
809 replicates (n = 30 +/+, 29 -/- at 2dpf and n = 30 +/+, 30 -/- at 3 dpf). (F) Quantification of

810 macrophage numbers in developmental, unwounded fins. Pooled from 4 independent  
811 replicates (n = 81 +/+, 74 -/- at 2dpf and n = 70 +/+, 66 -/-). (G) Representative images  
812 of H4cit3 immunostaining in 3 dpf unwounded control larvae with H4cit3 antibody label  
813 on the right and merged with the bright-field on the left. (H) Representative multiphoton  
814 microscopy 3D reconstruction showing enface view of the notochord bead at 24 hpw in  
815 *Tg(lepb:EGFP)* expressing (green) larvae labeled with H4cit3 immunofluorescence  
816 (magenta). Last image in row includes brightfield overlay. (I) Section view of the  
817 notochord bead, showing enface (x,y view) and orthogonal (x, z view is below; y, z view  
818 is to the right) sections, with section thickness shown 2  $\mu\text{m}$  for both x and y, 10  $\mu\text{m}$  in z.  
819 Scale bars = 10  $\mu\text{m}$ . (J,L) Representative images of active-Caspase3 labeled in (J)  
820 66hpw fins or (L) developmental, unwounded fins. Merged images of active-Caspase3  
821 (magenta) and DAPI (white) on the left, and single active-Caspase3 channel in white on  
822 the right. (K) Quantification of active-Caspase3 threshold area in *padi2<sup>-/-</sup>* and wild-type  
823 fins at 66 hpw from 3 independent replicates (n = 47 +/+, 47 -/-). (M) Representative  
824 images at 24 hpw and (N) quantification of mitotic cells labeled with phosphorylated  
825 histone H3 in MO injected larvae past the notochord (white dotted line) from 3  
826 independent replicates (24 hpw n = 68 control MO, 70 *padi2* MO and 3 dpf n = 71  
827 control MO, 64 *padi2* MO). All quantifications have Ismeans and SEM reported and p  
828 values were calculated by ANOVA. Scale bars = 100  $\mu\text{m}$ .

829

830

831

832 **Acknowledgements**

833 We thank members of the Huttenlocher lab for helpful discussions of the research as  
834 well as with technical support and zebrafish maintenance. We thank Dr. Emily Rosowski  
835 for her careful reading of the manuscript and suggestions and Dr. Laurel Hind for her  
836 critical edits of the manuscript. We would like to thank Francisco Barros Becker for  
837 assistance with FIJI analysis and Jens Eickhoff for advice on statistical analyses.

838

839 This work was supported by NIH R35 GM1 18027 01 to AH. NG was supported by a  
840 Molecular Biosciences Training Grant T32-GM07215, JK was supported by the  
841 American Heart Association grant (AHA16SDG30020001) and MAS by NIH/NIAMS K08  
842 AR065500. The authors declare no competing financial interests.

843

844 Author contributions: NG, JMS, MAS, KWE, JK and AH conceived and designed  
845 experiments. NG, DAB, JMS, JR, and PP conducted the experiments. NG and DAB  
846 performed the analysis. NG, JMS, and AH prepared the figures and wrote the  
847 manuscript.

848

849

850

851

## 852 **References**

853

- 854 Arita, K., H. Hashimoto, T. Shimizu, K. Nakashima, M. Yamada, and M. Sato. 2004. Structural  
855 basis for Ca(2+)-induced activation of human PAD4. *Nat Struct Mol Biol.* 11:777-783.
- 856 Bayes, A., M.O. Collins, R. Reig-Viader, G. Gou, D. Goulding, A. Izquierdo, J.S. Choudhary, R.D.  
857 Emes, and S.G. Grant. 2017. Evolution of complexity in the zebrafish synapse proteome.  
858 *Nat Commun.* 8:14613.
- 859 Buckley, K., and R.B. Kelly. 1985. Identification of a transmembrane glycoprotein specific for  
860 secretory vesicles of neural and endocrine cells. *J Cell Biol.* 100:1284-1294.
- 861 Chang, X., J. Han, L. Pang, Y. Zhao, Y. Yang, and Z. Shen. 2009. Increased PADI4 expression in  
862 blood and tissues of patients with malignant tumors. *BMC Cancer.* 9:40.
- 863 Cherrington, B.D., E. Morency, A.M. Struble, S.A. Coonrod, and J.J. Wakshlag. 2010. Potential  
864 role for peptidylarginine deiminase 2 (PAD2) in citrullination of canine mammary  
865 epithelial cell histones. *PLoS One.* 5:e11768.
- 866 Cherrington, B.D., X. Zhang, J.L. McElwee, E. Morency, L.J. Anguish, and S.A. Coonrod. 2012.  
867 Potential role for PAD2 in gene regulation in breast cancer cells. *PLoS One.* 7:e41242.
- 868 Christophorou, M.A., G. Castelo-Branco, R.P. Halley-Stott, C.S. Oliveira, R. Loos, A.  
869 Radzisheuskaya, K.A. Mowen, P. Bertone, J.C. Silva, M. Zernicka-Goetz, M.L. Nielsen, J.B.

- 870 Gurdon, and T. Kouzarides. 2014. Citrullination regulates pluripotency and histone H1  
871 binding to chromatin. *Nature*. 507:104-108.
- 872 Conklin, M.W., J.C. Eickhoff, K.M. Riching, C.A. Pehlke, K.W. Eliceiri, P.P. Provenzano, A. Friedl,  
873 and P.J. Keely. 2011. Aligned collagen is a prognostic signature for survival in human  
874 breast carcinoma. *Am J Pathol*. 178:1221-1232.
- 875 Coudane, F., M.C. Mechin, A. Hucheq, J. Henry, R. Nachat, A. Ishigami, V. Adoue, M. Sebbag, G.  
876 Serre, and M. Simon. 2011. Deimination and expression of peptidylarginine deiminases  
877 during cutaneous wound healing in mice. *Eur J Dermatol*. 21:376-384.
- 878 de Oliveira, S., C.C. Reyes-Aldasoro, S. Candel, S.A. Renshaw, V. Mulero, and A. Calado. 2013.  
879 Cxcl8 (IL-8) mediates neutrophil recruitment and behavior in the zebrafish inflammatory  
880 response. *J Immunol*. 190:4349-4359.
- 881 Esposito, G., A.M. Vitale, F.P. Leijten, A.M. Strik, A.M. Koonen-Reemst, P. Yurttas, T.J. Robben, S.  
882 Coonrod, and J.A. Gossen. 2007. Peptidylarginine deiminase (PAD) 6 is essential for  
883 oocyte cytoskeletal sheet formation and female fertility. *Mol Cell Endocrinol*. 273:25-31.
- 884 Falcao, A.M., M. Meijer, A. Scaglione, P. Rinwa, E. Agirre, J. Liang, S.C. Larsen, A. Heskol, R.  
885 Frawley, M. Klingener, M. Varas-Godoy, A. Raposo, P. Ernfors, D.S. Castro, M.L. Nielsen,  
886 P. Casaccia, and G. Castelo-Branco. 2019. PAD2-Mediated Citrullination Contributes to  
887 Efficient Oligodendrocyte Differentiation and Myelination. *Cell Rep*. 27:1090-1102  
888 e1010.
- 889 Gauron, C., C. Rampon, M. Bouzaffour, E. Ipendey, J. Teillon, M. Volovitch, and S. Vríz. 2013.  
890 Sustained production of ROS triggers compensatory proliferation and is required for  
891 regeneration to proceed. *Sci Rep*. 3:2084.
- 892 Globus, M., S. Vethamany-Globus, and A. Kesik. 1987. Control of blastema cell proliferation by  
893 possible interplay of calcium and cyclic nucleotides during newt limb regeneration.  
894 *Differentiation*. 35:94-99.
- 895 Gokirmak, T., J.P. Campanale, L.E. Shipp, G.W. Moy, H. Tao, and A. Hamdoun. 2012. Localization  
896 and substrate selectivity of sea urchin multidrug (MDR) efflux transporters. *J Biol Chem*.  
897 287:43876-43883.
- 898 Gyorgy, B., E. Toth, E. Tarcsa, A. Falus, and E.I. Buzas. 2006. Citrullination: a posttranslational  
899 modification in health and disease. *Int J Biochem Cell Biol*. 38:1662-1677.
- 900 Holmes, C.L., D. Shim, J. Kernien, C.J. Johnson, J.E. Nett, and M.A. Shelef. 2019. Insight into  
901 Neutrophil Extracellular Traps through Systematic Evaluation of Citrullination and  
902 Peptidylarginine Deiminases. *J Immunol Res*. 2019:2160192.
- 903 Kan, R., M. Jin, V. Subramanian, C.P. Causey, P.R. Thompson, and S.A. Coonrod. 2012. Potential  
904 role for PADI-mediated histone citrullination in preimplantation development. *BMC Dev*  
905 *Biol*. 12:19.
- 906 Kang, J., J. Hu, R. Karra, A.L. Dickson, V.A. Tornini, G. Nachtrab, M. Gemberling, J.A. Goldman,  
907 B.L. Black, and K.D. Poss. 2016. Modulation of tissue repair by regeneration enhancer  
908 elements. *Nature*. 532:201-206.
- 909 Kubilus, J., and H.P. Baden. 1983. Purification and properties of a brain enzyme which  
910 deiminates proteins. *Biochim Biophys Acta*. 745:285-291.
- 911 LaFave, M.C., G.K. Varshney, M. Vemulapalli, J.C. Mullikin, and S.M. Burgess. 2014. A defined  
912 zebrafish line for high-throughput genetics and genomics: NHGRI-1. *Genetics*. 198:167-  
913 170.

- 914 Lagoudakis, L., I. Garcin, B. Julien, K. Nahum, D.A. Gomes, L. Combettes, M.H. Nathanson, and T.  
915 Tordjmann. 2010. Cytosolic calcium regulates liver regeneration in the rat. *Hepatology*.  
916 52:602-611.
- 917 Lange, S., S. Gogel, K.Y. Leung, B. Vernay, A.P. Nicholas, C.P. Causey, P.R. Thompson, N.D.  
918 Greene, and P. Ferretti. 2011. Protein deiminases: new players in the developmentally  
919 regulated loss of neural regenerative ability. *Dev Biol*. 355:205-214.
- 920 LeBert, D., J.M. Squirrell, C. Freisinger, J. Rindy, N. Golenberg, G. Frecentese, A. Gibson, K.W.  
921 Eliceiri, and A. Huttenlocher. 2018. Damage-induced reactive oxygen species regulate  
922 vimentin and dynamic collagen-based projections to mediate wound repair. *Elife*. 7.
- 923 LeBert, D.C., J.M. Squirrell, A. Huttenlocher, and K.W. Eliceiri. 2016. Second harmonic  
924 generation microscopy in zebrafish. *Methods Cell Biol*. 133:55-68.
- 925 LeBert, D.C., J.M. Squirrell, J. Rindy, E. Broadbridge, Y. Lui, A. Zakrzewska, K.W. Eliceiri, A.H.  
926 Meijer, and A. Huttenlocher. 2015. Matrix metalloproteinase 9 modulates collagen  
927 matrices and wound repair. *Development*. 142:2136-2146.
- 928 Li, P., M. Li, M.R. Lindberg, M.J. Kennett, N. Xiong, and Y. Wang. 2010. PAD4 is essential for  
929 antibacterial innate immunity mediated by neutrophil extracellular traps. *J Exp Med*.  
930 207:1853-1862.
- 931 Liu, Y., Y.L. Lightfoot, N. Seto, C. Carmona-Rivera, E. Moore, R. Goel, L. O'Neil, P. Mistry, V.  
932 Hoffmann, S. Mondal, P.N. Premnath, K. Gribbons, S. Dell'Orso, K. Jiang, P.R. Thompson,  
933 H.W. Sun, S.A. Coonrod, and M.J. Kaplan. 2018. Peptidylarginine deiminases 2 and 4  
934 modulate innate and adaptive immune responses in TLR-7-dependent lupus. *JCI Insight*.  
935 3.
- 936 Livak, K.J., and T.D. Schmittgen. 2001. Analysis of relative gene expression data using real-time  
937 quantitative PCR and the 2(-Delta Delta C(T)) Method. *Methods*. 25:402-408.
- 938 Loos, T., A. Mortier, M. Gouwy, I. Ronsse, W. Put, J.P. Lenaerts, J. Van Damme, and P. Proost.  
939 2008. Citrullination of CXCL10 and CXCL11 by peptidylarginine deiminase: a naturally  
940 occurring posttranslational modification of chemokines and new dimension of  
941 immunoregulation. *Blood*. 112:2648-2656.
- 942 Loos, T., G. Opdenakker, J. Van Damme, and P. Proost. 2009. Citrullination of CXCL8 increases  
943 this chemokine's ability to mobilize neutrophils into the blood circulation.  
944 *Haematologica*. 94:1346-1353.
- 945 McCafferty, J., R. Reid, M. Spencer, T. Hamp, and A. Fodor. 2012. Peak Studio: a tool for the  
946 visualization and analysis of fragment analysis files. *Environ Microbiol Rep*. 4:556-561.
- 947 Miller, J.B., M.T. Crow, and F.E. Stockdale. 1985. Slow and fast myosin heavy chain content  
948 defines three types of myotubes in early muscle cell cultures. *J Cell Biol*. 101:1643-1650.
- 949 Miskolci, V., J.M. Squirrell, J. Rindy, W.J. Vincent, A. Gibson, K.W. Eliceiri, and A. Huttenlocher.  
950 2019. Distinct inflammatory and wound healing responses to complex caudal fin injuries  
951 of larval zebrafish. *Elife*.
- 952 Montague, T.G., J.M. Cruz, J.A. Gagnon, G.M. Church, and E. Valen. 2014. CHOPCHOP: a  
953 CRISPR/Cas9 and TALEN web tool for genome editing. *Nucleic Acids Res*. 42:W401-407.
- 954 Nakayama-Hamada, M., A. Suzuki, K. Kubota, T. Takazawa, M. Ohsaka, R. Kawaida, M. Ono, A.  
955 Kasuya, H. Furukawa, R. Yamada, and K. Yamamoto. 2005. Comparison of enzymatic  
956 properties between hPADI2 and hPADI4. *Biochem Biophys Res Commun*. 327:192-200.

- 957 Nechiporuk, A., and M.T. Keating. 2002. A proliferation gradient between proximal and msxb-  
958 expressing distal blastema directs zebrafish fin regeneration. *Development*. 129:2607-  
959 2617.
- 960 Niethammer, P. 2016. The early wound signals. *Curr Opin Genet Dev*. 40:17-22.
- 961 Powell, D., S. Tauzin, L.E. Hind, Q. Deng, D.J. Beebe, and A. Huttenlocher. 2017. Chemokine  
962 Signaling and the Regulation of Bidirectional Leukocyte Migration in Interstitial Tissues.  
963 *Cell Rep*. 19:1572-1585.
- 964 Prewitt, J.M., and M.L. Mendelsohn. 1966. The analysis of cell images. *Ann N Y Acad Sci*.  
965 128:1035-1053.
- 966 Proost, P., T. Loos, A. Mortier, E. Schutyser, M. Gouwy, S. Noppen, C. Dillen, I. Ronsse, R.  
967 Conings, S. Struyf, G. Opdenakker, P.C. Maudgal, and J. Van Damme. 2008. Citrullination  
968 of CXCL8 by peptidylarginine deiminase alters receptor usage, prevents proteolysis, and  
969 dampens tissue inflammation. *J Exp Med*. 205:2085-2097.
- 970 Rebl, A., B. Kollner, E. Anders, K. Wimmers, and T. Goldammer. 2010. Peptidylarginine  
971 deiminase gene is differentially expressed in freshwater and brackish water rainbow  
972 trout. *Mol Biol Rep*. 37:2333-2339.
- 973 Roehl, H.H. 2018. Linking wound response and inflammation to regeneration in the zebrafish  
974 larval fin. *Int J Dev Biol*. 62:473-477.
- 975 Rojas-Munoz, A., S. Rajadhyksha, D. Gilmour, F. van Bebber, C. Antos, C. Rodriguez Esteban, C.  
976 Nusslein-Volhard, and J.C. Izpisua Belmonte. 2009. ErbB2 and ErbB3 regulate  
977 amputation-induced proliferation and migration during vertebrate regeneration. *Dev*  
978 *Biol*. 327:177-190.
- 979 Romero, M.M.G., G. McCathie, P. Jankun, and H.H. Roehl. 2018. Damage-induced reactive  
980 oxygen species enable zebrafish tail regeneration by repositioning of Hedgehog  
981 expressing cells. *Nat Commun*. 9:4010.
- 982 Schindelin, J., I. Arganda-Carreras, E. Frise, V. Kaynig, M. Longair, T. Pietzsch, S. Preibisch, C.  
983 Rueden, S. Saalfeld, B. Schmid, J.Y. Tinevez, D.J. White, V. Hartenstein, K. Eliceiri, P.  
984 Tomancak, and A. Cardona. 2012. Fiji: an open-source platform for biological-image  
985 analysis. *Nat Methods*. 9:676-682.
- 986 Shelef, M.A., D.A. Bennin, D.F. Mosher, and A. Huttenlocher. 2012. Citrullination of fibronectin  
987 modulates synovial fibroblast behavior. *Arthritis Res Ther*. 14:R240.
- 988 Sipila, K., S. Haag, K. Denessiouk, J. Kapyla, E.C. Peters, A. Denesyuk, U. Hansen, Y. Konttinen,  
989 M.S. Johnson, R. Holmdahl, and J. Heino. 2014. Citrullination of collagen II affects  
990 integrin-mediated cell adhesion in a receptor-specific manner. *FASEB J*. 28:3758-3768.
- 991 Smith, T.F., and M.S. Waterman. 1981. Identification of common molecular subsequences. *J*  
992 *Mol Biol*. 147:195-197.
- 993 Struyf, S., S. Noppen, T. Loos, A. Mortier, M. Gouwy, H. Verbeke, D. Huskens, S. Luangsay, M.  
994 Parmentier, K. Geboes, D. Schols, J. Van Damme, and P. Proost. 2009. Citrullination of  
995 CXCL12 differentially reduces CXCR4 and CXCR7 binding with loss of inflammatory and  
996 anti-HIV-1 activity via CXCR4. *J Immunol*. 182:666-674.
- 997 Tseng, A.S., D.S. Adams, D. Qiu, P. Koustubhan, and M. Levin. 2007. Apoptosis is required during  
998 early stages of tail regeneration in *Xenopus laevis*. *Dev Biol*. 301:62-69.



- 999 Vincent, W.J., C.M. Freisinger, P.Y. Lam, A. Huttenlocher, and J.D. Sauer. 2016. Macrophages  
1000 mediate flagellin induced inflammasome activation and host defense in zebrafish. *Cell*  
1001 *Microbiol.* 18:591-604.
- 1002 Vossenaar, E.R., A.J. Zendman, W.J. van Venrooij, and G.J. Pruijn. 2003. PAD, a growing family of  
1003 citrullinating enzymes: genes, features and involvement in disease. *Bioessays.* 25:1106-  
1004 1118.
- 1005 Watanabe, K., K. Akiyama, K. Hikichi, R. Ohtsuka, A. Okuyama, and T. Senshu. 1988. Combined  
1006 biochemical and immunochemical comparison of peptidylarginine deiminases present in  
1007 various tissues. *Biochim Biophys Acta.* 966:375-383.
- 1008 Watanabe, K., and T. Senshu. 1989. Isolation and characterization of cDNA clones encoding rat  
1009 skeletal muscle peptidylarginine deiminase. *J Biol Chem.* 264:15255-15260.
- 1010 Whitehead, G.G., S. Makino, C.L. Lien, and M.T. Keating. 2005. fgf20 is essential for initiating  
1011 zebrafish fin regeneration. *Science.* 310:1957-1960.
- 1012 Wiese, M., A.J. Bannister, S. Basu, W. Boucher, K. Wohlfahrt, M.A. Christophorou, M.L. Nielsen,  
1013 D. Klenerman, E.D. Laue, and T. Kouzarides. 2019. Citrullination of HP1gamma  
1014 chromodomain affects association with chromatin. *Epigenetics Chromatin.* 12:21.
- 1015 Wilgus, T.A., S. Roy, and J.C. McDaniel. 2013. Neutrophils and Wound Repair: Positive Actions  
1016 and Negative Reactions. *Adv Wound Care (New Rochelle).* 2:379-388.
- 1017 Wong, S.L., M. Demers, K. Martinod, M. Gallant, Y. Wang, A.B. Goldfine, C.R. Kahn, and D.D.  
1018 Wagner. 2015. Diabetes primes neutrophils to undergo NETosis, which impairs wound  
1019 healing. *Nat Med.* 21:815-819.
- 1020 Xiao, S., J. Lu, B. Sridhar, X. Cao, P. Yu, T. Zhao, C.C. Chen, D. McDee, L. Sloofman, Y. Wang, M.  
1021 Rivas-Astroza, B. Telugu, D. Levasseur, K. Zhang, H. Liang, J.C. Zhao, T.S. Tanaka, G.  
1022 Stormo, and S. Zhong. 2017. SMARCD1 Contributes to the Regulation of Naive  
1023 Pluripotency by Interacting with Histone Citrullination. *Cell Rep.* 18:3117-3128.
- 1024 Yang, Z., C. Steentoft, C. Hauge, L. Hansen, A.L. Thomsen, F. Niola, M.B. Vester-Christensen, M.  
1025 Frodin, H. Clausen, H.H. Wandall, and E.P. Bennett. 2015. Fast and sensitive detection of  
1026 indels induced by precise gene targeting. *Nucleic Acids Res.* 43:e59.
- 1027 Yen, J.C., F.J. Chang, and S. Chang. 1995. A new criterion for automatic multilevel thresholding.  
1028 *IEEE Trans Image Process.* 4:370-378.
- 1029 Yokoyama, H. 2008. Initiation of limb regeneration: the critical steps for regenerative capacity.  
1030 *Dev Growth Differ.* 50:13-22.
- 1031 Yoo, S.K., C.M. Freisinger, D.C. LeBert, and A. Huttenlocher. 2012a. Early redox, Src family  
1032 kinase, and calcium signaling integrate wound responses and tissue regeneration in  
1033 zebrafish. *J Cell Biol.* 199:225-234.
- 1034 Yoo, S.K., P.Y. Lam, M.R. Eichelberg, L. Zasadil, W.M. Bement, and A. Huttenlocher. 2012b. The  
1035 role of microtubules in neutrophil polarity and migration in live zebrafish. *J Cell Sci.*  
1036 125:5702-5710.
- 1037 Yoshida, K., O. Korchynskiy, P.P. Tak, T. Isozaki, J.H. Ruth, P.L. Campbell, D.L. Baeten, D.M.  
1038 Gerlag, M.A. Amin, and A.E. Koch. 2014. Citrullination of epithelial neutrophil-activating  
1039 peptide 78/CXCL5 results in conversion from a non-monocyte-recruiting chemokine to a  
1040 monocyte-recruiting chemokine. *Arthritis Rheumatol.* 66:2716-2727.
- 1041 Yuzhalin, A.E., A.N. Gordon-Weeks, M.L. Tognoli, K. Jones, B. Markelc, R. Konietzny, R. Fischer,  
1042 A. Muth, E. O'Neill, P.R. Thompson, P.J. Venables, B.M. Kessler, S.Y. Lim, and R.J.

- 1043 Muschel. 2018. Colorectal cancer liver metastatic growth depends on PAD4-driven  
1044 citrullination of the extracellular matrix. *Nat Commun.* 9:4783.
- 1045 Zhang, X., X. Liu, M. Zhang, T. Li, A. Muth, P.R. Thompson, S.A. Coonrod, and X. Zhang. 2016.  
1046 Peptidylarginine deiminase 1-catalyzed histone citrullination is essential for early  
1047 embryo development. *Sci Rep.* 6:38727.
- 1048 Zheng, L., M. Nagar, A.J. Maurais, D.J. Slade, S.S. Parelkar, S.A. Coonrod, E. Weerapana, and P.R.  
1049 Thompson. 2019. Calcium regulates the nuclear localization of protein arginine  
1050 deiminase 2. *Biochemistry.* 58:3042-3056
- 1051
- 1052

## Figure 1: Characterization of zebrafish Padi2

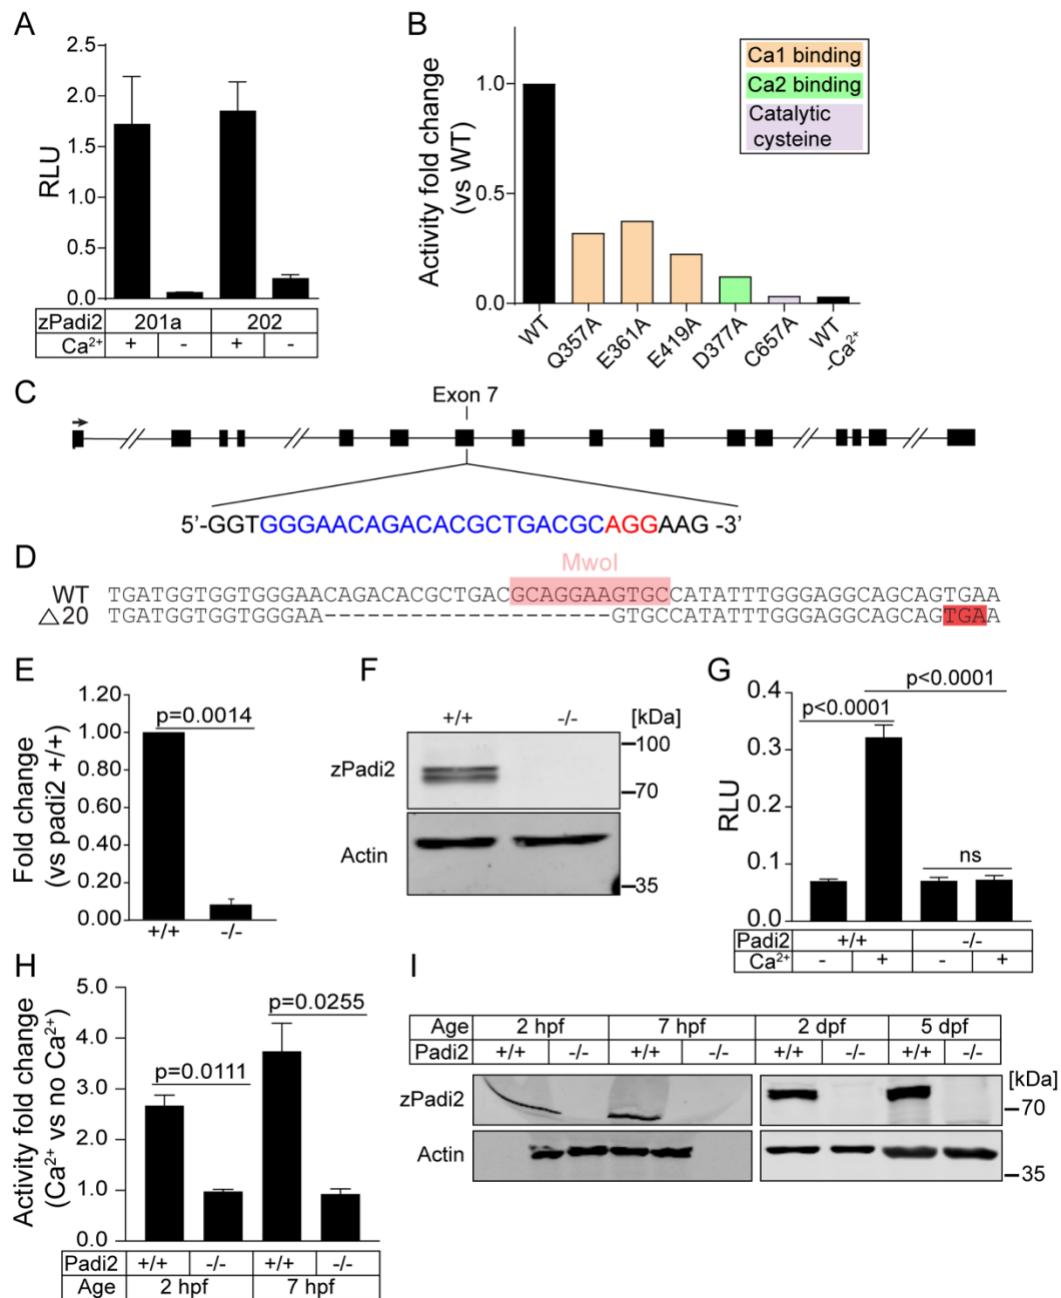

**Figure 2: Padi2 is required for proper regeneration and leukocyte recruitment**

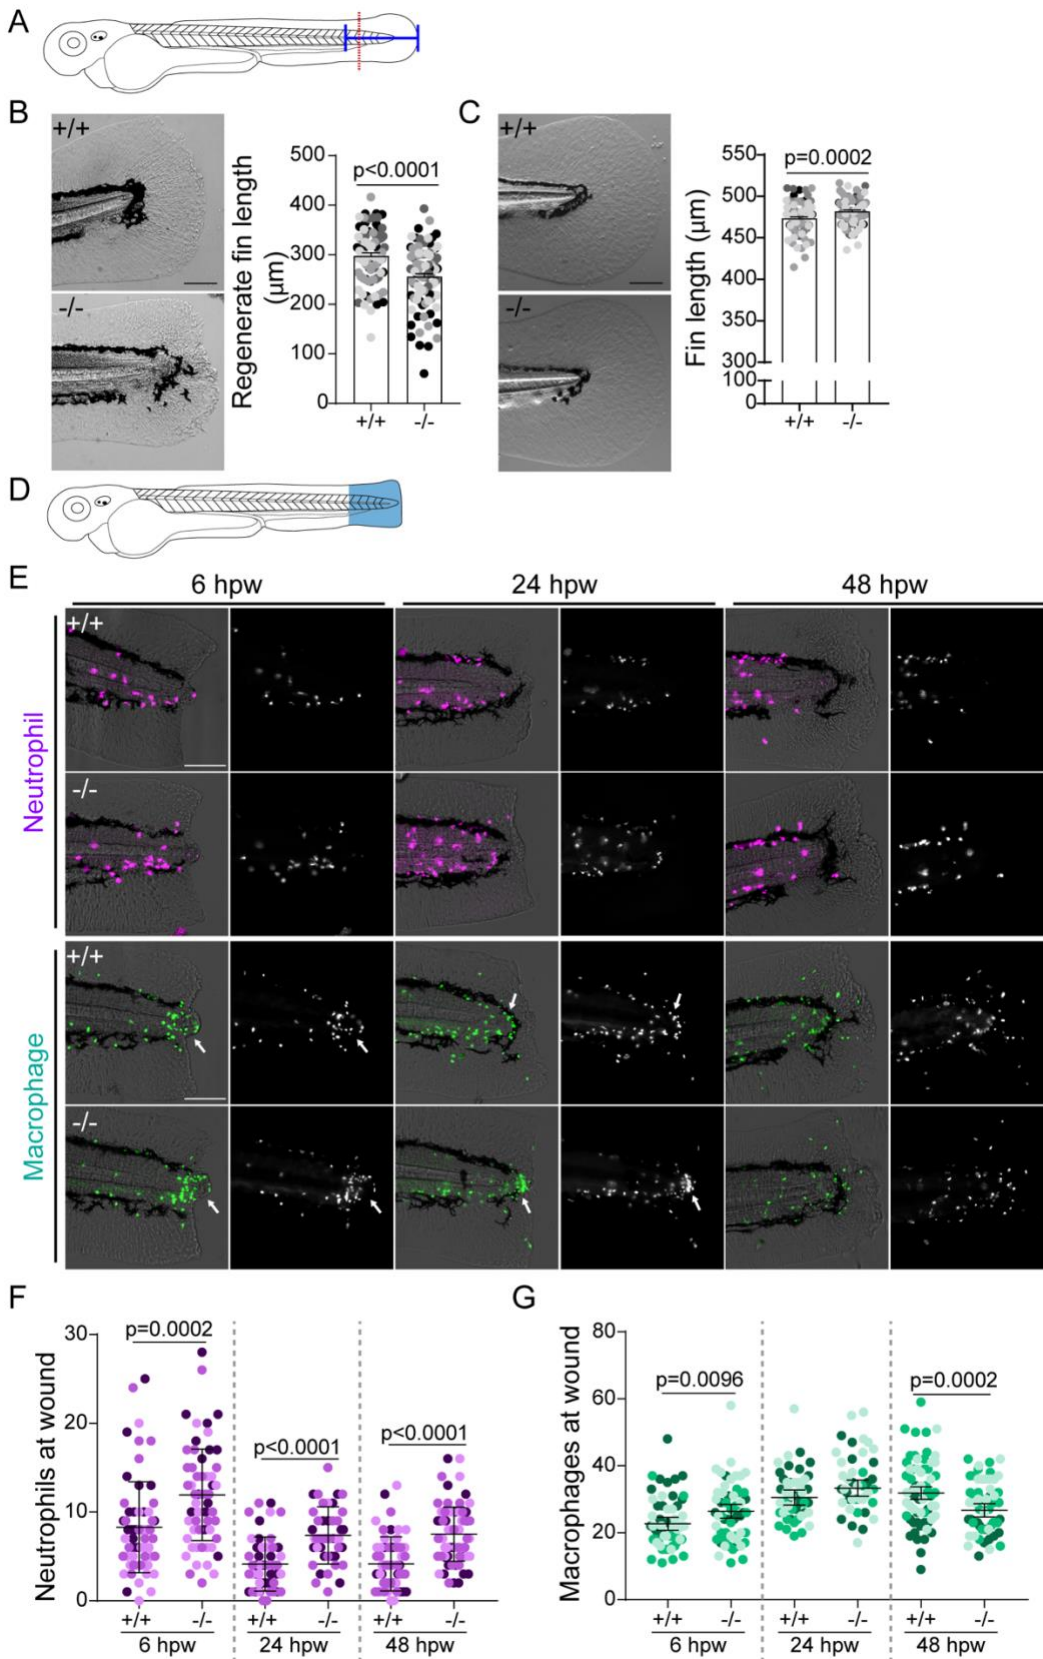

### Figure 3: Tail transection stimulates localized Padi2-dependent histone H4 citrullination

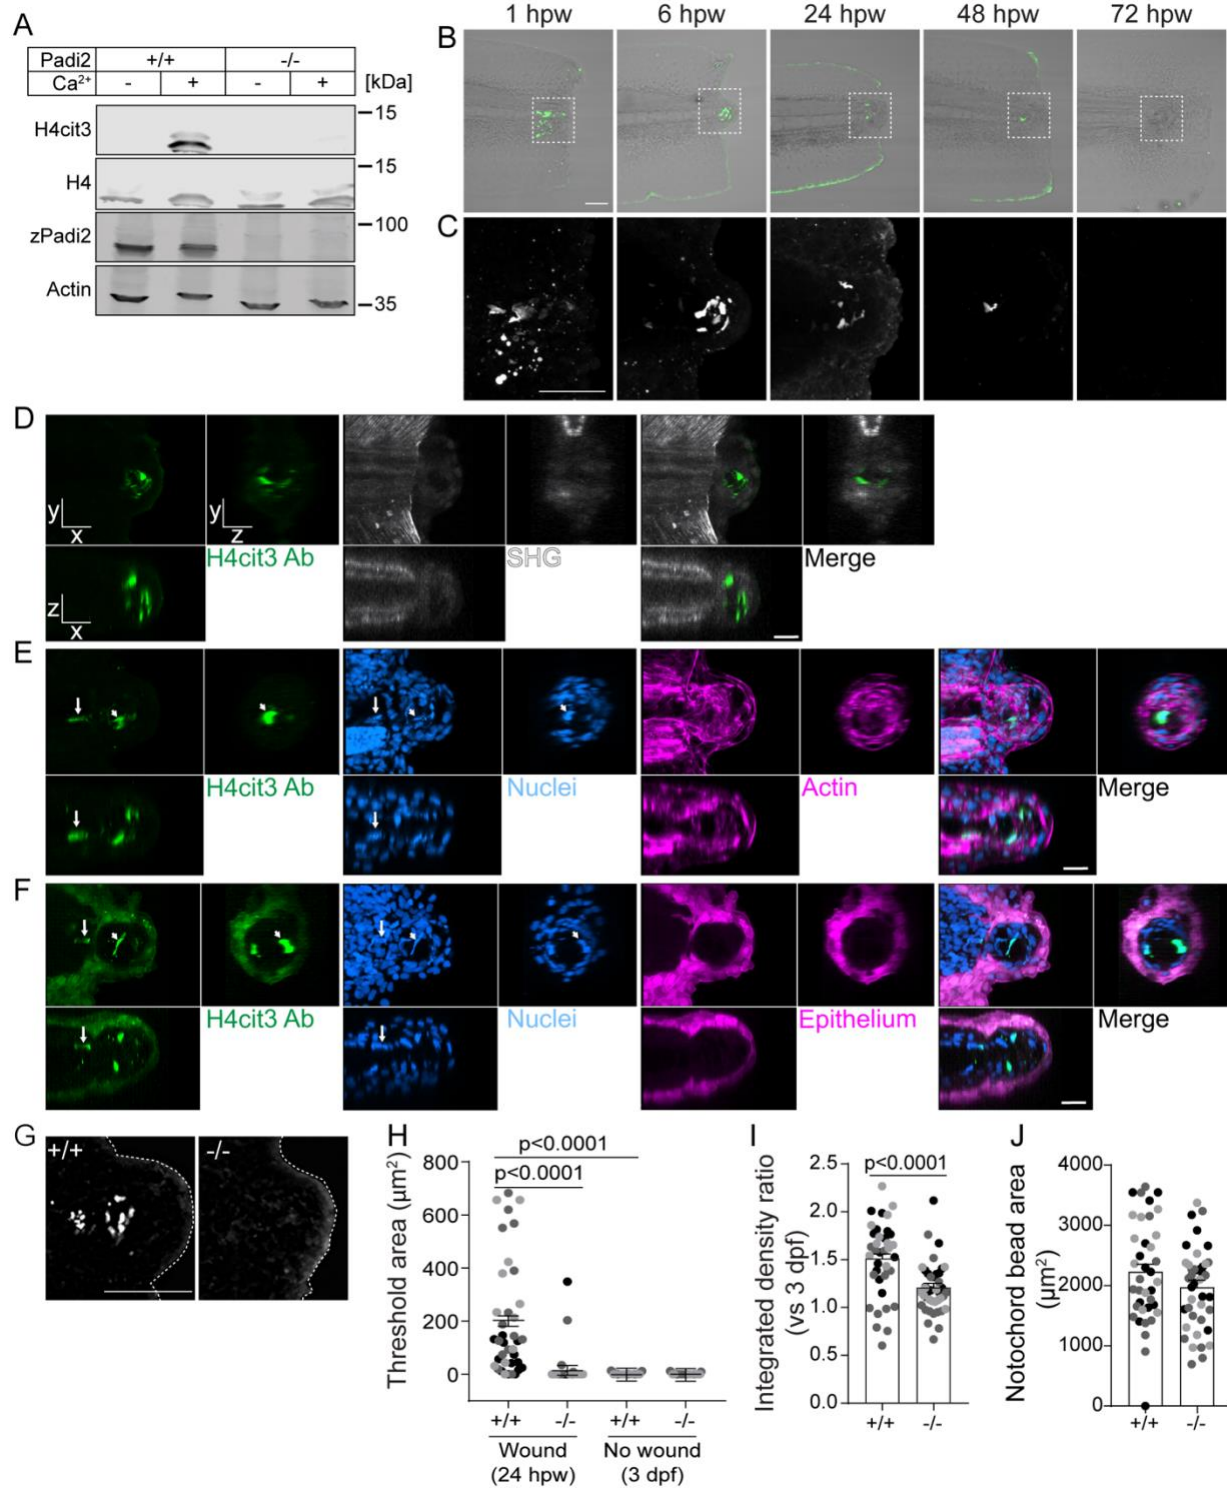

**Figure 4: Wound-induced proliferation is perturbed in Padi2-deficient larvae**

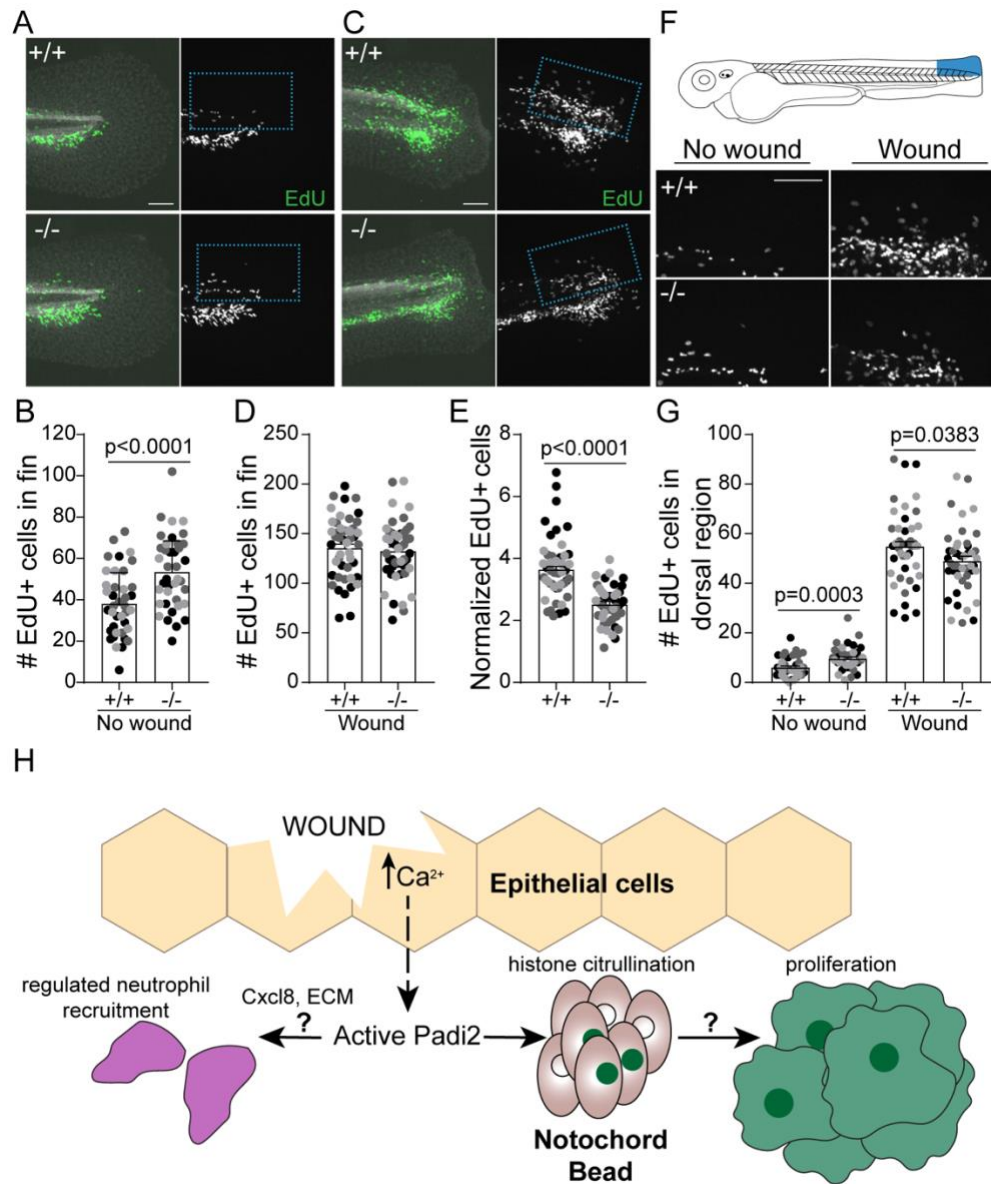

Source: https://www.biorxiv.org/content/10.1101/2019.12.27.889378v1.full.pdf
